# Supplementary material for: Synthesis and applications of secondary amine derivatives of (+)-dehydroabietylamine in chiral molecular recognition
Source: Royal Society of Chemistry journal article supplement (doi:10.1039/c5ob01667c), 2015-01-01

## ELECTRONIC SUPPLEMENTARY INFORMATION (ESI)

# Synthesis and Applications of Secondary Amine Derivatives of (+)-Dehydroabietylamine as Chiral Molecular Recognition

Tiina Laaksonen, Sami Heikkinen and Kristiina Wähälä\*

Department of Chemistry, University of Helsinki, A.I. Virtasen aukio 1, P.O. Box 55, FI-00014  
University of Helsinki, Finland

\*Corresponding author  
e-Mail: [kristiina.wahala@helsinki.fi](mailto:kristiina.wahala@helsinki.fi)

### TABLE OF CONTENTS

|       |                                                     |    |
|-------|-----------------------------------------------------|----|
| 1     | NMR MEASUREMENT AND PROCESSING PARAMETERS           | 2  |
| 2     | CHIRAL RECOGNITION STUDIES                          | 3  |
| 3     | TITRATION                                           | 5  |
| 3.1   | Titration of 7 with 6a                              | 5  |
| 3.1.1 | The effect of increasing concentration of <b>6a</b> | 7  |
| 3.2   | Titration of 8 with 6b                              | 10 |
| 3.2.1 | Dependence of concentration on $\Delta\delta$       | 12 |
| 4     | ENANTIOMERIC EXCESS STUDIES                         | 13 |
| 4.1   | Enantiomeric excess measurements of 7 with 6a       | 13 |
| 4.2   | Enantiomeric excess measurements of 8 with 6b       | 13 |
| 5     | SEPARATION OF CARBOXYLIC ACIDS                      | 14 |
| 5.1   | Separation of carboxylic acids with 6a              | 14 |
| 5.2   | Separation of carboxylic acids with 6b              | 16 |
| 6     | NMR SPECTRA OF SYNTHESISED CSAS                     | 18 |

## 1 NMR MEASUREMENT AND PROCESSING PARAMETERS

### *Compound characterisation*

All NMR experiments were performed using Varian UNITY INOVA 500 and Varian Mercury Plus 300 instruments at 27 °C. <sup>1</sup>H NMR spectra were recorded with 6-16 transients, 8000-6712.5 Hz spectral width, and 1.9 s acquisition time at 500 MHz. <sup>13</sup>C NMR spectra were recorded with 1876-532 transients, 31446-20000 Hz spectral width and 1-1.9 s acquisition time at 125 or 75 MHz. All 2D HSQC spectra were recorded using Varian UNITY INOVA 500 with 4 transients, 128 increments, 8000-6712.5 Hz spectral width in <sup>1</sup>H-dimension, 25133 Hz spectral width in <sup>13</sup>C-dimension, 1.0 s relaxation delay, and 1.3 s acquisition time.

### *Resolution experiments*

All NMR measurements were recorded using Varian UNITY INOVA 500 at 27 °C. <sup>1</sup>H NMR spectra were recorded with 16 transients, 8000 Hz spectral width, 5.0 s relaxation delay and 1.9 s acquisition time at 500 MHz. <sup>19</sup>F NMR spectra were recorded with 16-32 transients, 19047 Hz spectral width, 5.0 s relaxation delay and 1.0 s acquisition time at 470 MHz. HMBC spectra were recorded using Varian UNITY INOVA 500 with 4-6 transients, 400 increments, 1.0 s relaxation delay and 0.128 s acquisition time. The spectral widths were 4247.2-8000 Hz and 30165.9-25133.5 Hz in <sup>1</sup>H- and <sup>13</sup>C-dimensions, respectively.

### *DOSY Experiment (see 3.1.1)*

For DOSY experiment, Bipolar Pulse Pair Simulated Echo (BPPSTE)<sup>1</sup> pulse sequence was used. To measure DOSY dataset, 25 different diffusion gradient amplitudes were used (range 0.5-20.0 G/cm). Gradient pulse shape was rectangular. Diffusion gradient duration was 1.0 ms, eddy current recovery delay was 0.2 ms, and diffusion time was 250.0 ms. The DOSY dataset was measured using 16 steady state scans, 4 transients, and 2.0 s relaxation delay. Spectral width in <sup>1</sup>H-dimension was 6982.63 Hz and the number of acquired complex data points was 7000. The data was apodized by Gaussian weighting function and zero-filled up to 16384 complex points prior to Fourier transformation. Finally, two-dimensional DOSY spectra was calculated using DOSY-macro (a monoexponential fit) incorporated in Varian VNMR 6.1C spectrometer operating software.

1 M. D. Pelta, H. Barjat, G. A. Morris, A. L. Davis, S. J. Hammond, *Magn. Reson. Chem.*, **1998**, 36, 10, 706-714

### *Dynamic NMR studies (see 3.1.1)*

All NMR measurements were recorded using Varian UNITY INOVA 500. <sup>1</sup>H NMR spectra were recorded with 16-64 transients, 8000 Hz spectral width, and 1.9 s acquisition time at temperature range -65 to +50 °C.

## 2 CHIRAL RECOGNITION STUDIES

Solutions of **7** and **8** (22.0 mM in  $\text{CDCl}_3$ ) were prepared. Compound **1-6 ab** (1.0 eq or 2.0 eq) were dissolved in 0.5 mL (1.0 eq) of prepared solution of guest and both  $^1\text{H}$  and  $^{19}\text{F}$  NMR spectra were recorded.

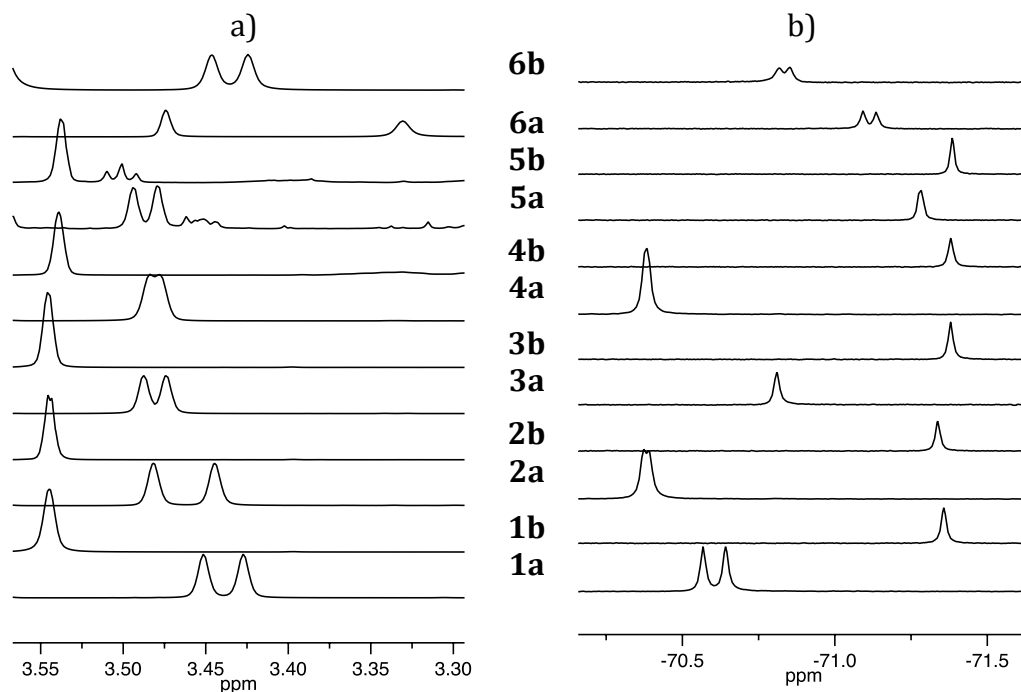

Figure 1. Chiral recognition of enantiomers of **7**. Host:guest molar ratio 1:1 a)  $^1\text{H}$  NMR ( $\text{OCH}_3$  peak) and b)  $^{19}\text{F}$  NMR ( $\text{CF}_3$  peak)

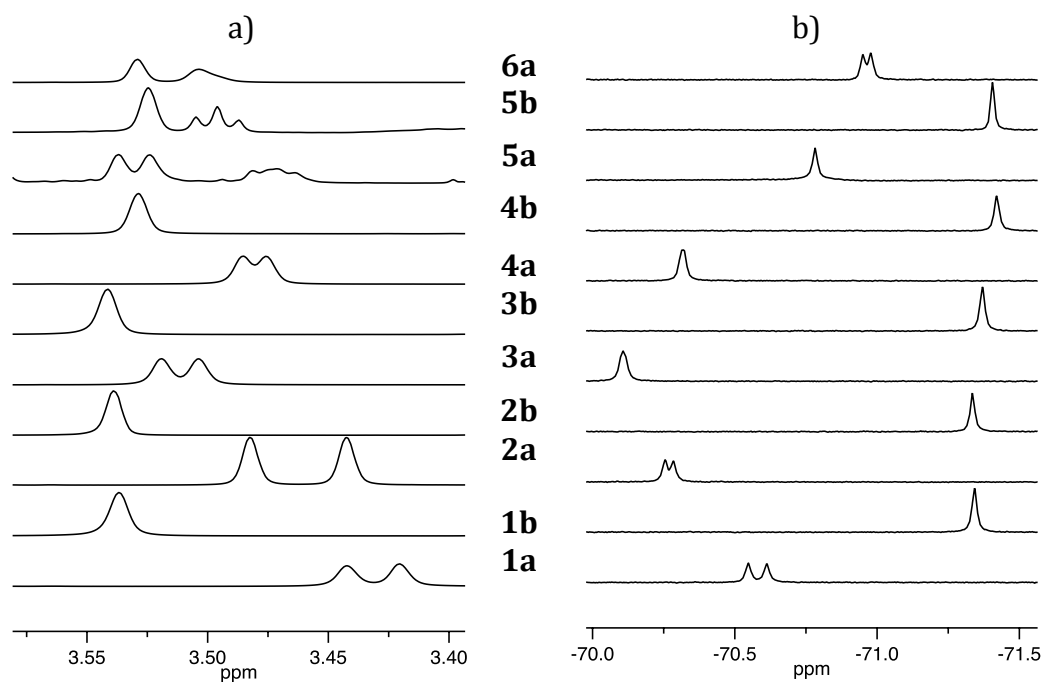

Figure 2 Chiral recognition of enantiomers of **7**. Host:guest molar ratio 2:1 a)  $^1\text{H}$  NMR ( $\text{OCH}_3$  peak) and b)  $^{19}\text{F}$  NMR ( $\text{CF}_3$  peak)

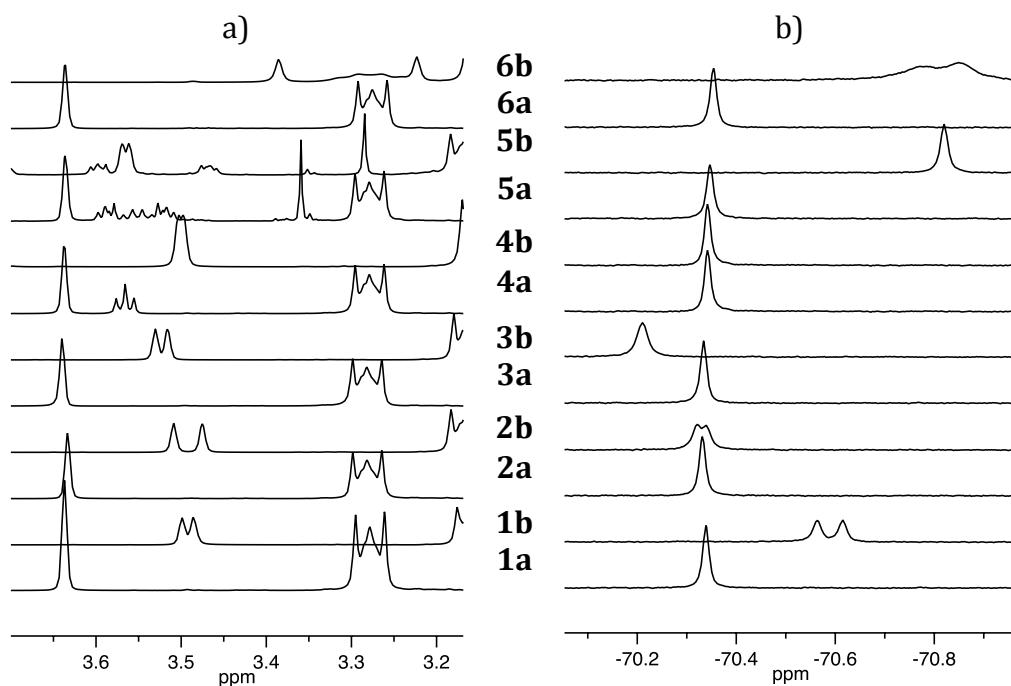

Figure 3. Chiral recognition of enantiomers of **8**. Host:guest molar ratio 1:1 a)  $^1\text{H}$  NMR ( $\text{OCH}_3$  peak) and b)  $^{19}\text{F}$  NMR ( $\text{CF}_3$  peak)

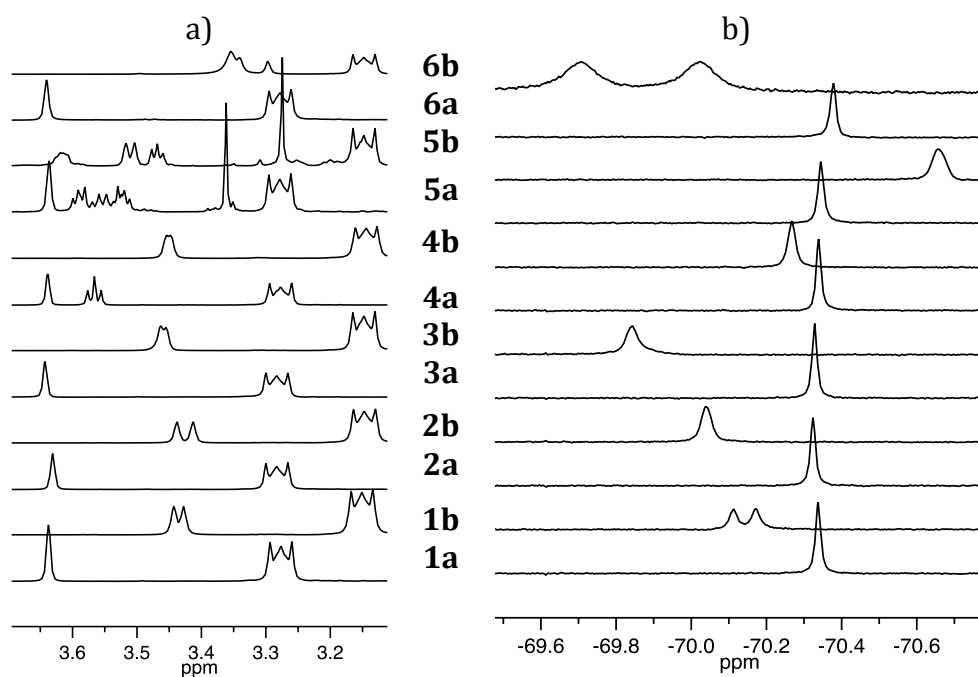

Figure 4. Chiral recognition of enantiomers of **8**. Host:guest molar ratio 2:1 a)  $^1\text{H}$  NMR ( $\text{OCH}_3$  peak) and b)  $^{19}\text{F}$  NMR ( $\text{CF}_3$  peak)

HMBC spectra from sample containing **6a** and **7**, as well as from sample containing **6b** and **8** were recorded. From spectra was noticed that **6a** and **6b** are able to resolve the chiral carbon of the used model compound (Fig 5).

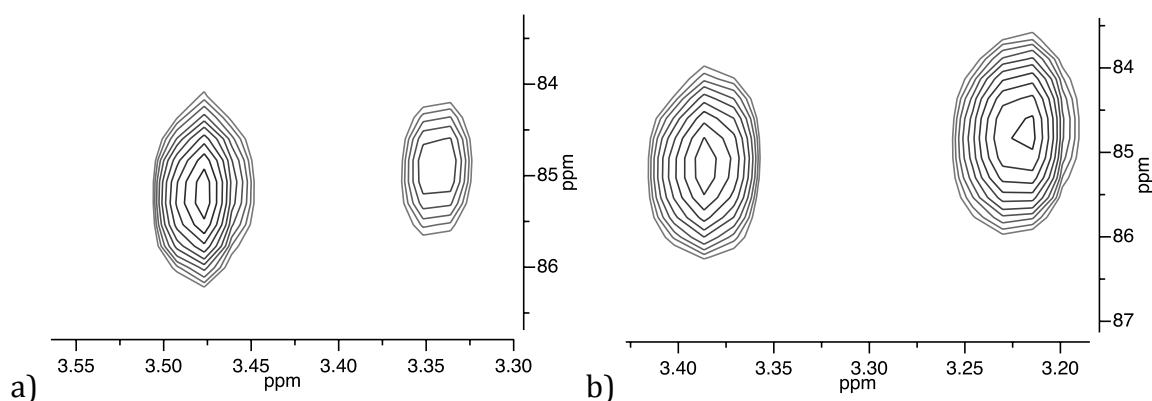

Figure 5. Separation of chiral carbon of *S* and *R* enantiomers (in HMBC spectra) of a) **7** with **6a** ( $\Delta\delta$  0.28 ppm, 35.3 Hz) and b) **8** with **6b** ( $\Delta\delta$  0.42 ppm, 52.5 Hz) in guest:host ratio 1:1.

### 3 TITRATION

#### 3.1 Titration of **7** with **6a**

Titration solutions containing the guest, **7** (2.0 mM) and host, **6a** (46.6 mM) were prepared. In NMR tube 0.5 mL of guest solution was measured and titrated by 1.0-5.0  $\mu$ L doses of host solution. Both  $^1\text{H}$  and  $^{19}\text{F}$  NMR spectra were recorded. Concentration of guest is assumed to remain constant during the titration.

Table 1. Experimental data from titration of **7** with **6a**

| c of <b>6a</b> (mM) | V of <b>6a</b> (mL) | $^1\text{H}$ NMR           |                            |                                    |                                    | $^{19}\text{F}$ NMR        |                            |                                    |                                    |
|---------------------|---------------------|----------------------------|----------------------------|------------------------------------|------------------------------------|----------------------------|----------------------------|------------------------------------|------------------------------------|
|                     |                     | $\delta$ of <i>S</i> (ppm) | $\delta$ of <i>R</i> (ppm) | $\Delta\delta_S$ of <i>S</i> (ppm) | $\Delta\delta_R$ of <i>R</i> (ppm) | $\delta$ of <i>S</i> (ppm) | $\delta$ of <i>R</i> (ppm) | $\Delta\delta_S$ of <i>S</i> (ppm) | $\Delta\delta_R$ of <i>R</i> (ppm) |
| 0                   | 0                   | 3.5335                     | 3.5335                     | 0                                  | 0                                  | -71.053                    | -71.053                    | 0                                  | 0                                  |
| 0.093013972         | 0.001               | 3.495                      | 3.521                      | 0.0385                             | 0.0125                             | -71.074                    | -71.074                    | 0.021                              | 0.021                              |
| 0.231840796         | 0.0025              | 3.443                      | 3.502                      | 0.0905                             | 0.0315                             | -71.09                     | -71.09                     | 0.037                              | 0.037                              |
| 0.461386139         | 0.005               | 3.362                      | 3.473                      | 0.1715                             | 0.0605                             | -71.124                    | -71.124                    | 0.071                              | 0.071                              |
| 0.688669951         | 0.0075              | 3.289                      | 3.446                      | 0.2445                             | 0.0875                             | -71.135                    | -71.172                    | 0.082                              | 0.119                              |
| 0.91372549          | 0.01                | 3.23                       | 3.423                      | 0.3035                             | 0.1105                             | -71.148                    | -71.221                    | 0.095                              | 0.168                              |
| 1.003131115         | 0.011               | 3.219                      | 3.419                      | 0.3145                             | 0.1145                             | -71.147                    | -71.231                    | 0.094                              | 0.178                              |
| 1.0921875           | 0.012               | 3.225                      | 3.424                      | 0.3085                             | 0.1095                             | -71.143                    | -71.231                    | 0.09                               | 0.178                              |
| 1.180896686         | 0.013               | 3.241                      | 3.433                      | 0.2925                             | 0.1005                             | -71.137                    | -71.219                    | 0.084                              | 0.166                              |
| 1.357281553         | 0.015               | 3.279                      | 3.453                      | 0.2545                             | 0.0805                             | -71.123                    | -71.196                    | 0.07                               | 0.143                              |
| 1.792307692         | 0.02                | 3.378                      | 3.491                      | 0.1555                             | 0.0425                             | -71.095                    | -71.147                    | 0.042                              | 0.094                              |
| 2.219047619         | 0.025               | 3.442                      | 3.513                      | 0.0915                             | 0.0205                             | -71.074                    | -71.117                    | 0.021                              | 0.064                              |
| 2.637735849         | 0.03                | 3.477                      | 3.523                      | 0.0565                             | 0.0105                             | -71.061                    | -71.101                    | 0.008                              | 0.048                              |
| 3.048598131         | 0.035               | 3.497                      | 3.528                      | 0.0365                             | 0.0055                             | -71.055                    | -71.093                    | 0.002                              | 0.04                               |
| 3.451851852         | 0.04                | 3.509                      | 3.532                      | 0.0245                             | 0.0015                             | -71.05                     | -71.086                    | -0.003                             | 0.033                              |
| 3.847706422         | 0.045               | 3.518                      | 3.533                      | 0.0155                             | 0.0005                             | -71.045                    | -71.083                    | -0.008                             | 0.03                               |
| 4.236363636         | 0.05                | 3.524                      | 3.534                      | 0.0095                             | -0.0005                            | -71.043                    | -71.08                     | -0.01                              | 0.027                              |
| 4.618018018         | 0.055               | 3.535                      | 3.535                      | -0.0015                            | -0.0015                            | -71.043                    | -71.077                    | -0.01                              | 0.024                              |
| 4.992857143         | 0.06                | 3.535                      | 3.535                      | -0.0015                            | -0.0015                            | -71.04                     | -71.075                    | -0.013                             | 0.022                              |

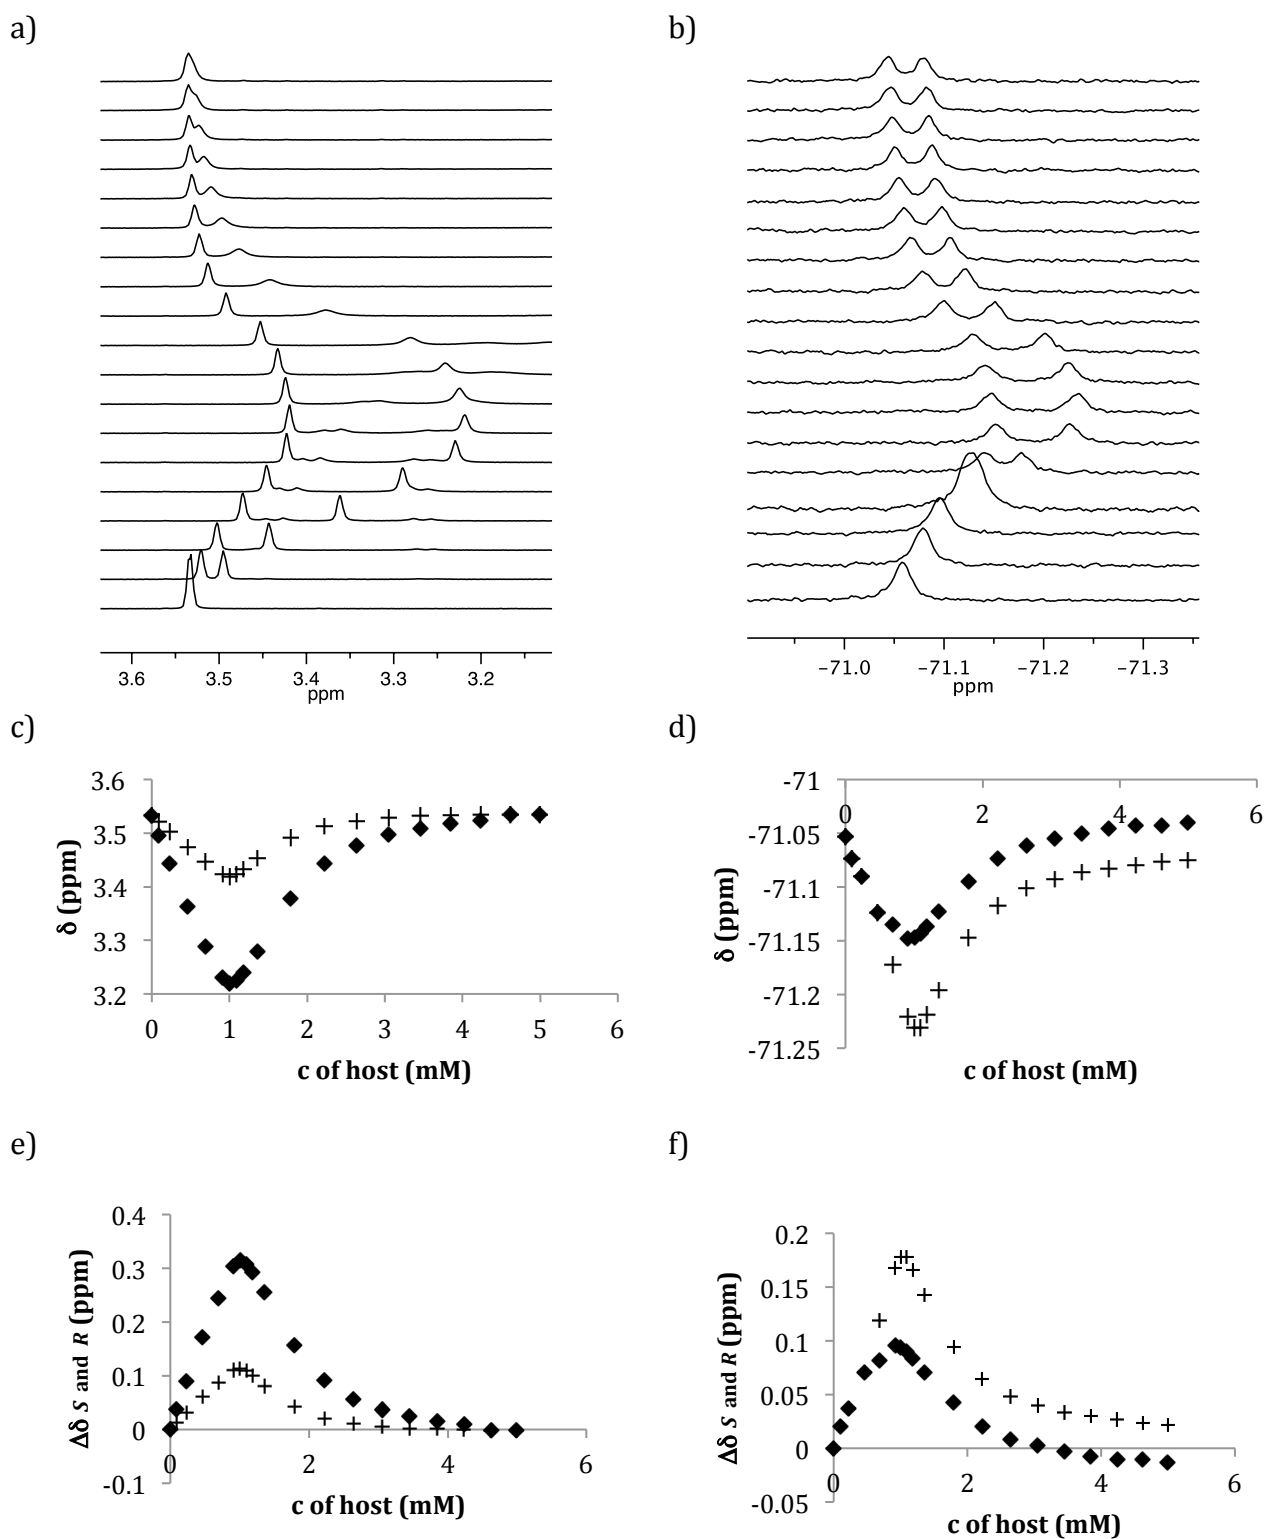

Figure 6. Spectra from titration of **7** with **6a** a)  $^1\text{H}$  NMR and b)  $^{19}\text{F}$  NMR. The change of chemical shifts of *S* and *R* enantiomers of **7** as a function of the concentration of **6a** c)  $^1\text{H}$  NMR and d)  $^{19}\text{F}$  NMR. The chemical shift change of the *S* and *R* enantiomers ( $\Delta\delta_S$  and  $\Delta\delta_R$ ) of **7**, as a function of the concentration of **6a** e)  $^1\text{H}$  NMR and f)  $^{19}\text{F}$  NMR. (+ *R* enantiomer and ◆ *S* enantiomer)

To study the complexation Job's plot was calculated from the titration results (Fig 7). At the point where the molar ratio is 0.5:1 Job's plot indicated complexation 0.5:1 (both *S* and *R* enantiomer has the maximum at point at 0.333 at the Job's plot).

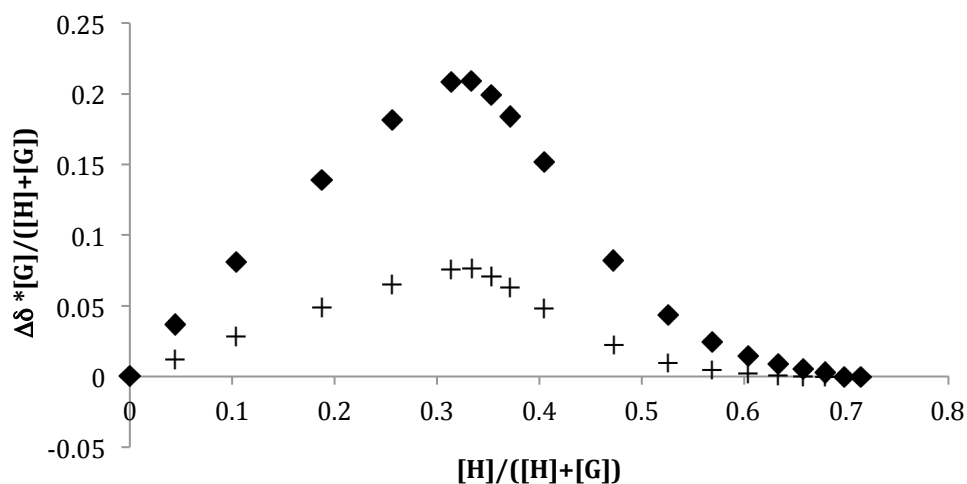

Figure 7. Job's plot from titration results (based on results from  $^1\text{H}$  NMR) (+ *R* enantiomer and ◆ *S* enantiomer).

### 3.1.1 The effect of increasing concentration of **6a**

During the titration (as well as while performing chiral recognition studies) the methoxy peak signal from *S* enantiomer of **7** was noted to broaden. This was presumed to originate from strong binding of *S* enantiomer to host **6a** leading to intermediate exchange between free and bound forms.

To observe the free and bound forms of *S* enantiomer dynamic NMR study was performed (Fig 8). Sample (in  $\text{CD}_2\text{Cl}_2$ ) containing only *S*-**7** (0.5 mL, 2.0 M, 1.0 eq) and host **6a** (0.22  $\mu\text{L}$ , 46.6 M, 1.0 eq) was cooled down to  $-65\text{ }^\circ\text{C}$ . To maximise the temperature range  $\text{CD}_2\text{Cl}_2$  (min  $-95\text{ }^\circ\text{C}$ ) was used as solvent instead of  $\text{CDCl}_3$  ( $-63\text{ }^\circ\text{C}$ ). Also the effect of increasing temperature to the peak width was studied. Sample containing **7** (0.5 mL, 2.0 M, 1.0 eq) and host **6a** (0.22  $\mu\text{L}$ , 46.6 M, 1.0 eq) in  $\text{CDCl}_3$  was heated up to  $+50\text{ }^\circ\text{C}$ .

At temperature  $-65\text{ }^\circ\text{C}$  the separation of the free and bound forms of *S* enantiomer is clearly detected (Fig. 8 a)). Temperature has notable effect on the shape of peak of *S* enantiomer (Fig 8 b)). The line width increases while temperature decreases (i.e. decreased exchange rate between free and bound form) and oppositely decreases at higher temperature (i.e. increased exchange rate between free and bound form). The line width of *R* enantiomer remains virtually unaffected throughout the studied temperature range. The result thus indicates higher affinity of *S* enantiomer with the host compared to *R* enantiomer.

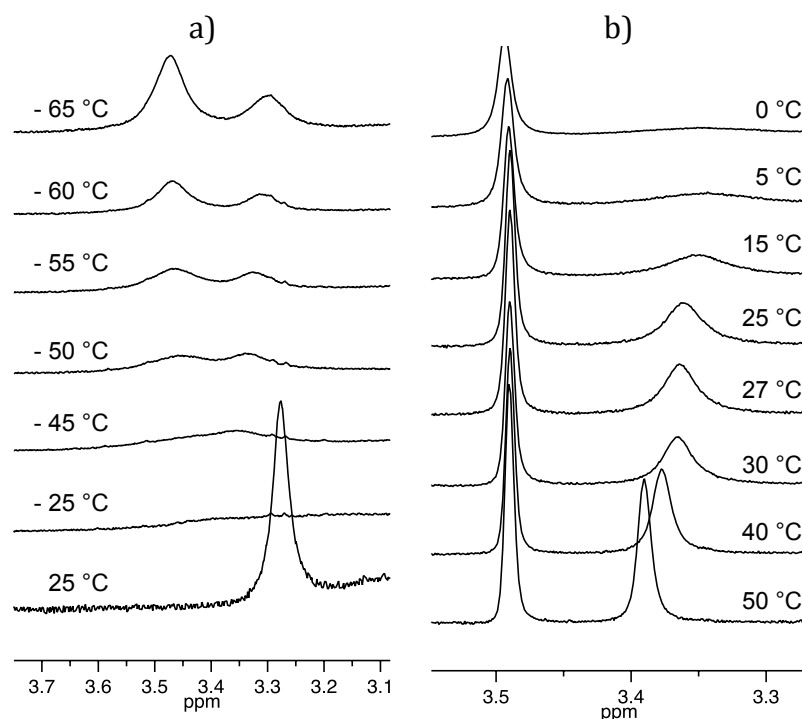

Figure 8. a) Dynamic NMR experiment in  $\text{CD}_2\text{Cl}_2$  with enantiopure *S*-7 (-65 °C to +25 °C) and b) dynamic NMR experiment in  $\text{CDCl}_3$  with **7** (0 °C to 50 °C)

Stronger binding also increases apparent molar weight of *S* enantiomer compare to *R* enantiomer. This was observed in DOSY experiment (Fig 9) where *S* enantiomer displays smaller diffusion coefficient.

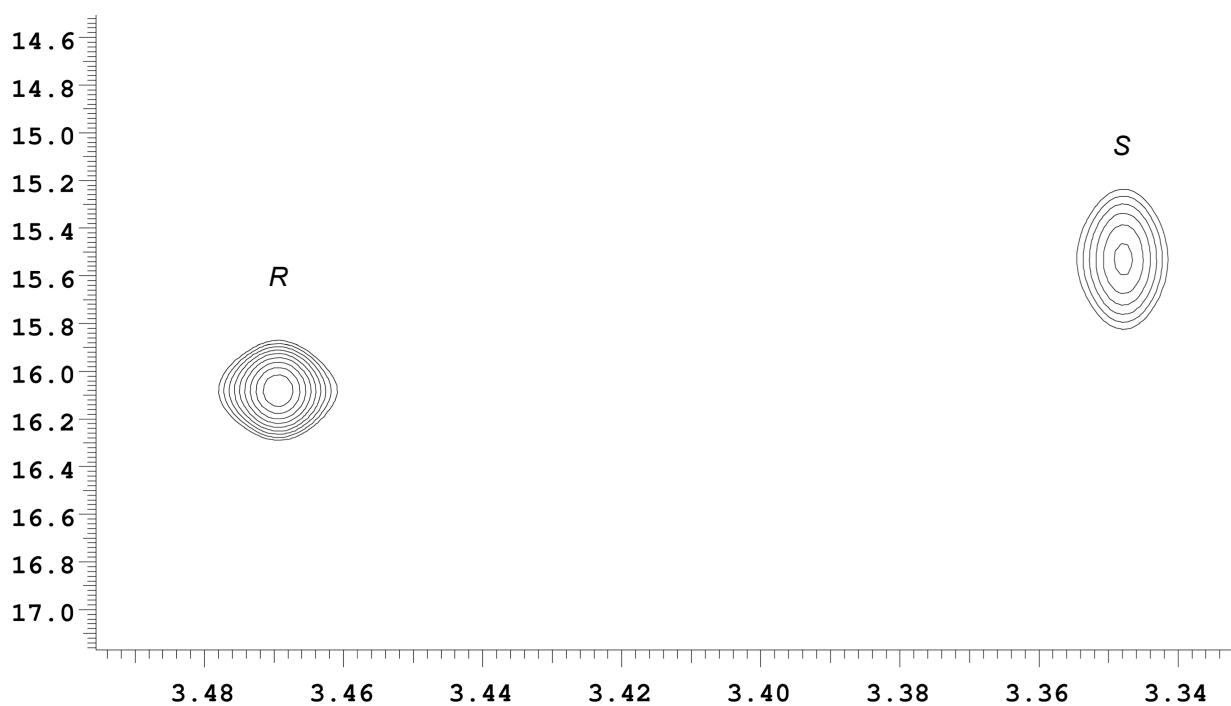

Figure 9. DOSY experiment of sample containing **7** and **6a** in 1:1 composition ( $D_S = 15.5 \times 10^{-10} \text{ m}^2/\text{s}$  and  $D_R = 16.1 \times 10^{-10} \text{ m}^2/\text{s}$ ).



To find if the complex formation occur in the same manner with pure enantiomer, *S*-7 was titrated with **6a** (Fig. 10). As in the case of racemic **7** the maximum separation was obtained at point where the host guest ratio was 1:2. When the concentration of host was increased the chemical shift change decreased as in the case of **7**. Also the peak width was observed to increase when the 1:2 host:guest ratio was reached.

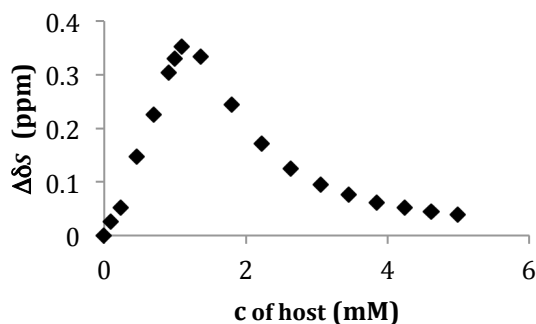

Figure 10. Chemical shift change of *S*-7 in the function of concentration.

The chemical shift of *S*-enantiomer in racemic mixture (0.315 ppm) was smaller than in titration containing only *S*-enantiomer (0.352 ppm). This might be caused by formation of complex *SHR* in racemic mixture instead of *SHS* as with pure *S*-7. It is also possible that some amount of *SHS* (as well as *RHR*) is formed with *SHR* when racemic **7** is titrated. Based on these assumptions the complexation pattern could be presumed to go in the manner illustrated in the Figure 11.

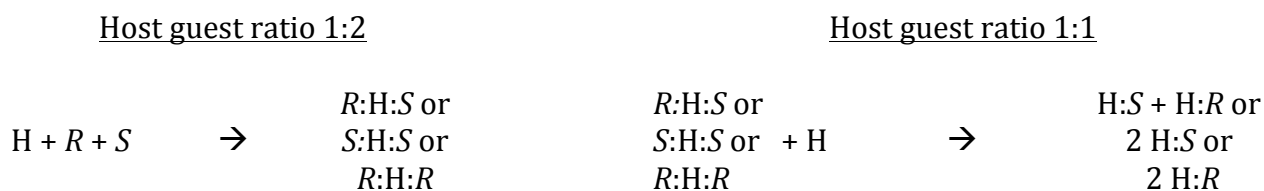

Figure 11. Possible complexation pattern formation in the titration of **7** with **6a**.

### 3.2 Titration of **8** with **6b**

Due to solubility problems of **6b** to CDCl<sub>3</sub>, titration was performed in opposite manner compared to **6a**. Titration solutions containing the **6b**, host (2.0 mM) and guest **8** (46.6 mM) were prepared. In NMR tube 0.5 mL of host solution (1.0 eq) was measured and titrated by 2.5-5.0 μL doses of guest solution. Both <sup>1</sup>H and <sup>19</sup>F NMR spectra were recorded. Concentration of host (**6b**) is presumed to remain constant during titration.

Table 2. Experimental data from titration of **8** with **6b**

| c of <b>8</b> (mM) | V of <b>8</b> (mL) | <sup>1</sup> H NMR <sup>[a]</sup> |                     |                                          |                                          | <sup>19</sup> F NMR <sup>[b]</sup> |                     |                                          |                                          |
|--------------------|--------------------|-----------------------------------|---------------------|------------------------------------------|------------------------------------------|------------------------------------|---------------------|------------------------------------------|------------------------------------------|
|                    |                    | δ of <i>S</i> (ppm)               | δ of <i>R</i> (ppm) | Δδ <sub><i>S</i></sub> of <i>S</i> (ppm) | Δδ <sub><i>R</i></sub> of <i>R</i> (ppm) | δ of <i>S</i> (ppm)                | δ of <i>R</i> (ppm) | Δδ <sub><i>S</i></sub> of <i>S</i> (ppm) | Δδ <sub><i>R</i></sub> of <i>R</i> (ppm) |
| 0                  | 0                  | 0                                 | 0                   | 0                                        | 0                                        | 0                                  | 0                   | 0                                        | 0                                        |
| 0.231840796        | 0.0025             | 3.328                             | 3.407               | 0.303                                    | 0.224                                    | -70.585                            | -70.636             | -0.029                                   | 0.022                                    |
| 0.461386139        | 0.005              | 3.325                             | 3.406               | 0.306                                    | 0.225                                    | -70.614                            | -70.676             | 0                                        | 0.062                                    |
| 0.91372549         | 0.01               | 3.329                             | 3.406               | 0.302                                    | 0.225                                    | -70.745                            | -70.797             | 0.131                                    | 0.183                                    |
| 1.357281553        | 0.015              | 3.241                             | 3.408               | 0.39                                     | 0.223                                    | -71.007                            | -71.007             | 0.393                                    | 0.393                                    |
| 1.575845411        | 0.0175             | 3.223                             | 3.41                | 0.408                                    | 0.221                                    | -71.069                            | -71.108             | 0.455                                    | 0.494                                    |
| 1.792307692        | 0.02               | 3.213                             | 3.412               | 0.418                                    | 0.219                                    | -71.109                            | -71.18              | 0.495                                    | 0.566                                    |
| 2.006698565        | 0.0225             | 3.213                             | 3.417               | 0.418                                    | 0.214                                    | -71.133                            | -71.219             | 0.519                                    | 0.605                                    |
| 2.219047619        | 0.025              | 3.221                             | 3.425               | 0.41                                     | 0.206                                    | -71.143                            | -71.236             | 0.529                                    | 0.622                                    |
| 2.429383886        | 0.0275             | 3.242                             | 3.443               | 0.389                                    | 0.188                                    | -71.127                            | -71.206             | 0.513                                    | 0.592                                    |
| 2.637735849        | 0.03               | 3.273                             | 3.462               | 0.358                                    | 0.169                                    | -71.105                            | -71.166             | 0.491                                    | 0.552                                    |
| 3.048598131        | 0.035              | 3.323                             | 3.493               | 0.308                                    | 0.138                                    | -71.061                            | -71.095             | 0.447                                    | 0.481                                    |
| 3.451851852        | 0.04               | 3.364                             | 3.516               | 0.267                                    | 0.115                                    | -71.024                            | -71.024             | 0.41                                     | 0.41                                     |
| 3.847706422        | 0.045              | 3.395                             | 3.532               | 0.236                                    | 0.099                                    | -70.986                            | -70.986             | 0.372                                    | 0.372                                    |
| 4.236363636        | 0.05               | 3.421                             | 3.543               | 0.21                                     | 0.088                                    | -70.951                            | -70.951             | 0.337                                    | 0.337                                    |
| 4.618018018        | 0.055              | 3.441                             | 3.553               | 0.19                                     | 0.078                                    | -70.922                            | -70.922             | 0.308                                    | 0.308                                    |
| 4.992857143        | 0.06               | 3.458                             | 3.561               | 0.173                                    | 0.07                                     | -70.896                            | -70.896             | 0.282                                    | 0.282                                    |
| 5.722807018        | 0.07               | 3.485                             | 3.571               | 0.146                                    | 0.06                                     | -70.854                            | -70.854             | 0.24                                     | 0.24                                     |
| 6.427586207        | 0.08               | 3.505                             | 3.579               | 0.126                                    | 0.052                                    | -70.823                            | -70.823             | 0.209                                    | 0.209                                    |
| 7.108474576        | 0.09               | 3.521                             | 3.586               | 0.11                                     | 0.045                                    | -70.796                            | -70.796             | 0.182                                    | 0.182                                    |

[a] The peak of OCH<sub>3</sub> in <sup>1</sup>H NMR is at 3.631 ppm and [b] the peak of CF<sub>3</sub> in <sup>19</sup>F NMR is at -70.614 ppm when the concentration of **8** is 2.0 mM (no host added).

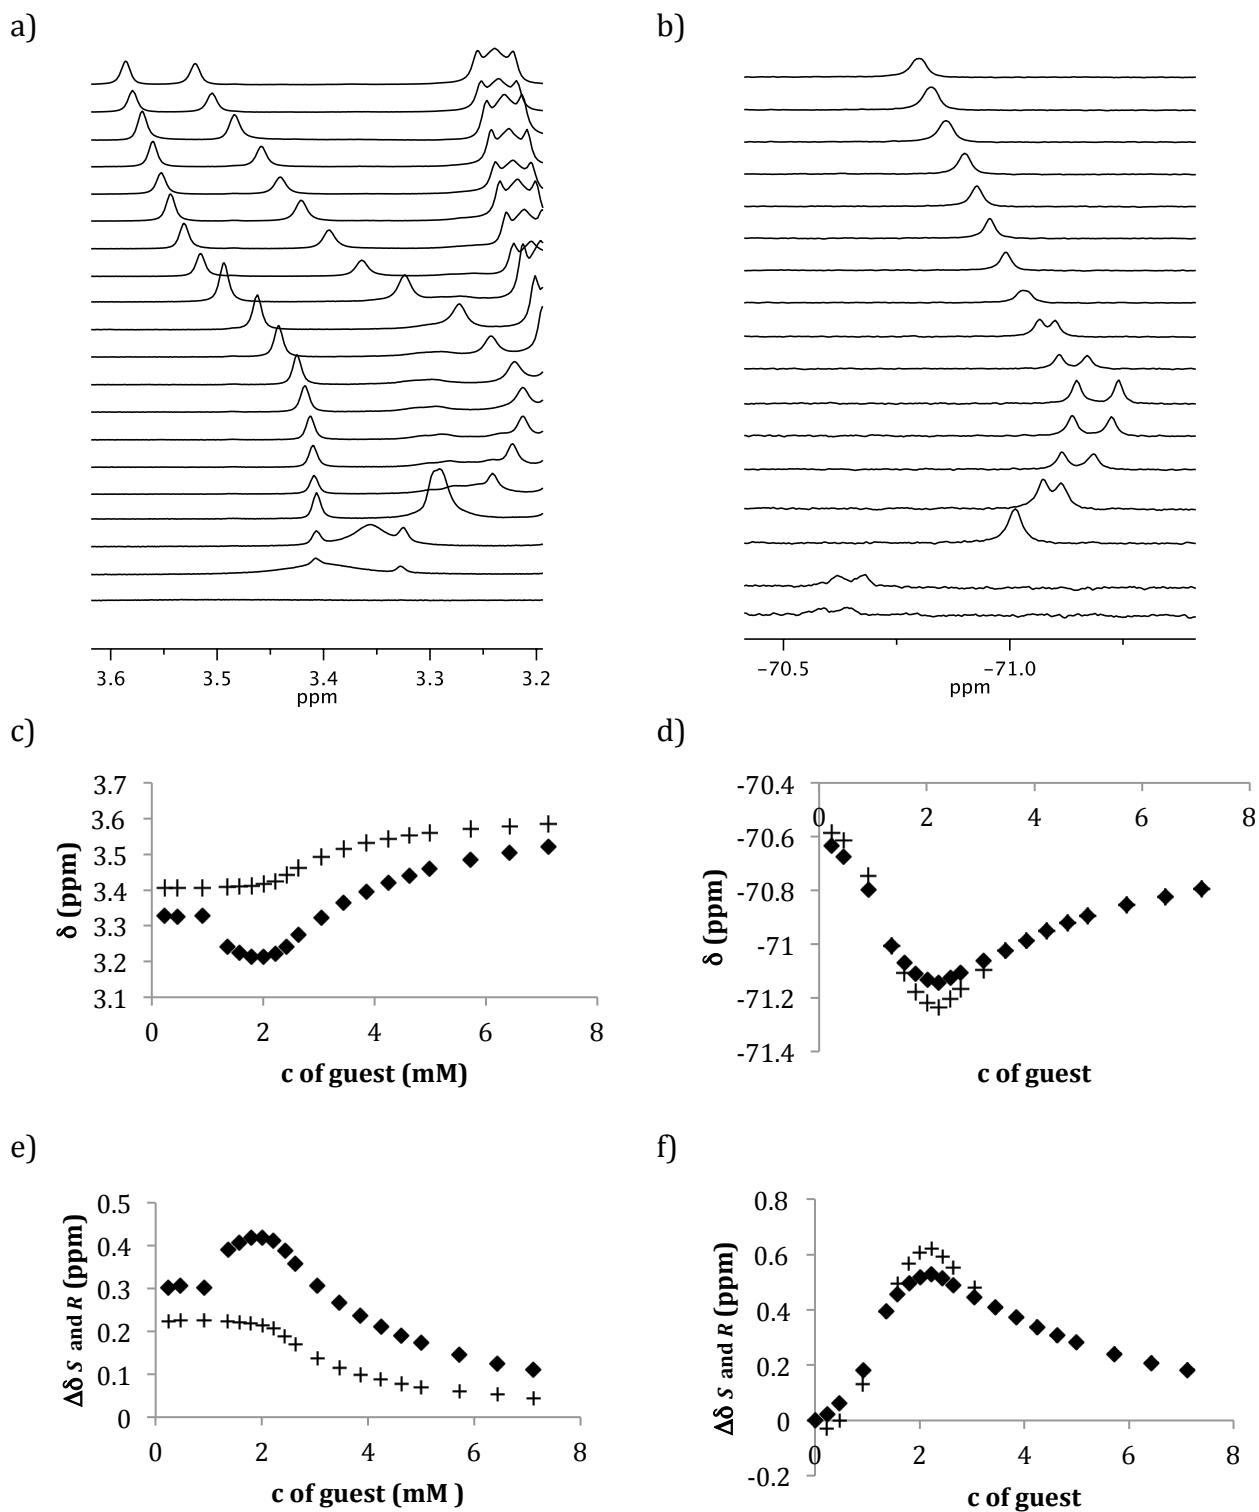

Figure 12. Spectra from titration of **8** with **6b** a)  $^1\text{H}$  NMR and b)  $^{19}\text{F}$  NMR. The change of chemical shifts of *S* and *R* enantiomers of **8** c)  $^1\text{H}$  NMR and d)  $^{19}\text{F}$  NMR. The chemical shift change of the *S* and *R* enantiomers ( $\Delta\delta_S$  and  $\Delta\delta_R$ ) of **8** e)  $^1\text{H}$  NMR and f)  $^{19}\text{F}$  NMR. (+ *R* enantiomer and ♦ *S* enantiomer)

To study the complexation Job's plot was calculated from the titration results (Fig. 12). At the point where the molar ratio is 1:1 Job's plot indicated complexation 1:1 (both *S* and *R* enantiomer has the maximum at point at 0.5).

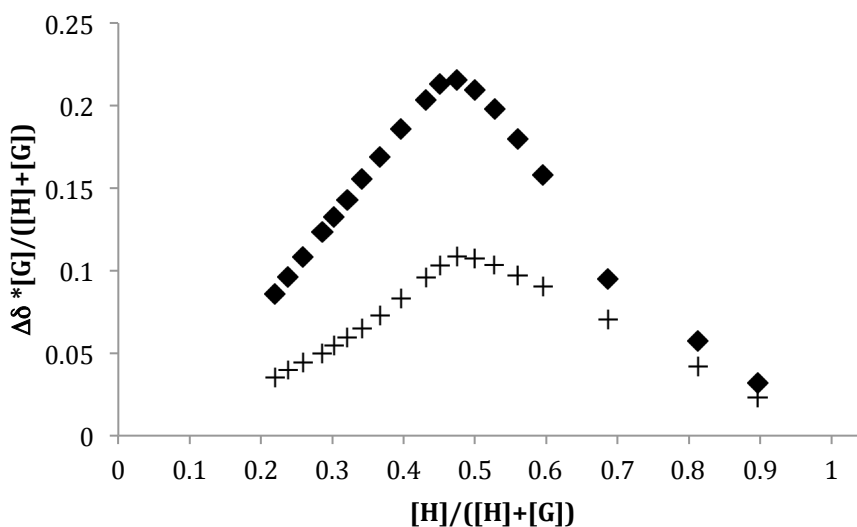

Figure 13. Job's plot from titration results (based on results from  $^1\text{H}$  NMR) (+ *R* enantiomer and ◆ *S* enantiomer).

### 3.2.1 Dependence of concentration on $\Delta\delta$

During the titration of **6b** (2.0 mM) the chemical shift difference between *R* and *S* enantiomers ( $\Delta\delta$ ) in  $^{19}\text{F}$  NMR spectra was not as high as in enantiomeric separation experiments (22.0 mM). To investigate if the concentration had an effect on  $\Delta\delta$ , a sample containing host:guest in ration 2:1 (22.0 mM) was diluted by  $\text{CDCl}_3$  (Fig. 14). Results indicate that the concentration has distinct effect on the  $\Delta\delta$  at  $^{19}\text{F}$  NMR (change of  $\Delta\delta$ : 0.08 ppm, 37.6 Hz), however, in the case of  $^1\text{H}$  NMR slight increase in  $\Delta\delta$  values was detected (change of  $\Delta\delta$ : 0.006 ppm, 3.0 Hz).

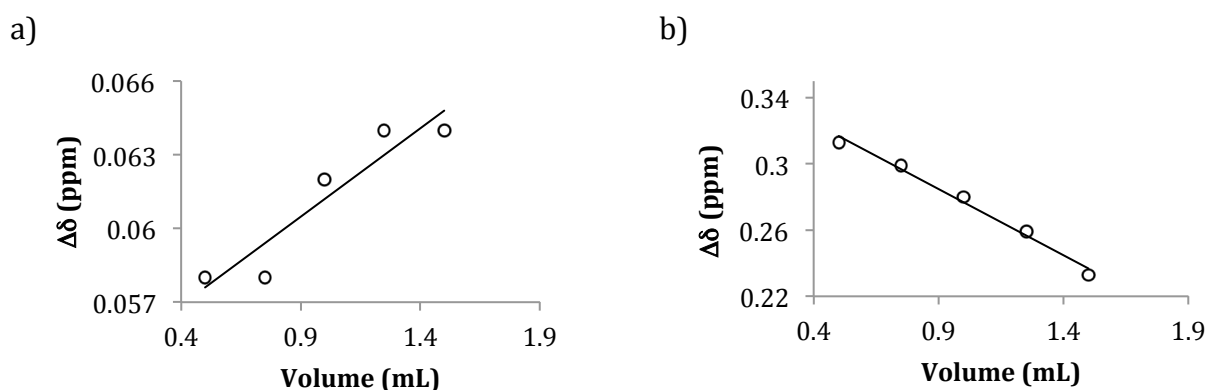

Figure 14. The effect of increased solvent volume ( $\text{CDCl}_3$ ) on  $\Delta\delta$  in a)  $^1\text{H}$  NMR and b)  $^{19}\text{F}$  NMR.

## 4 ENANTIOMERIC EXCESS STUDIES

### 4.1 Enantiomeric excess measurements of 7 with 6a

In ee% determination studies solutions of racemic **7** and *S*-**7** were prepared (2.0 mM). Mixtures of enantiomerically enriched samples were prepared in NMR tube (0.5 mL, 2.0 mM, 1.0 eq) and added **6a** (46.6 mM, 22.5  $\mu$ L, 1.0 eq) and recorded spectra. Due to overlapping of peaks of host and guest, 1.0 eq (22.5  $\mu$ L 46.6 mM) of **6a** was added instead of 0.5.

Table 3. ee% determined from  $^1\text{H}$  NMR spectra

| <i>S</i> (mL) | <i>R/S</i> (mL) | Expected <i>S/R</i> | Measured <i>S/R</i> | Area <i>S</i> | Area <i>R</i> | Expected ee% ( <i>S</i> ) | Measured ee% ( <i>S</i> ) |
|---------------|-----------------|---------------------|---------------------|---------------|---------------|---------------------------|---------------------------|
| 0             | 0.5             | 1                   | 0.965717071         | 2488.509      | 2576.851      | 50                        | 49.12797906               |
| 0.1           | 0.4             | 1.5                 | 1.474179057         | 23892.418     | 16207.27      | 60                        | 59.58255336               |
| 0.2           | 0.3             | 2.333               | 2.31684909          | 25898.506     | 11178.331     | 70                        | 69.85090449               |
| 0.25          | 0.25            | 3                   | 2.915923268         | 28472.871     | 9764.616      | 75                        | 74.46323813               |
| 0.3           | 0.2             | 4                   | 3.401767245         | 28246.343     | 8303.432      | 80                        | 77.28185194               |

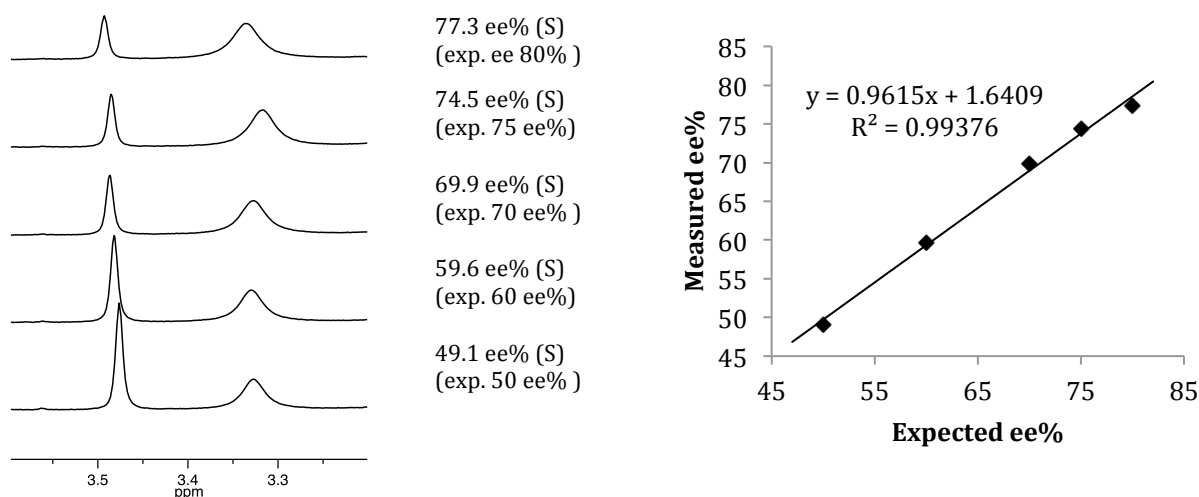

Figure 15. Results from ee% determination ( $^1\text{H}$  NMR).

### 4.2 Enantiomeric excess measurements of 8 with 6b

Due to solubility problems of **6b** ee% measurements were performed in opposite manner compared to **6a**. Solutions of racemic **8** and *S*-**8** were prepared (46.6 mM) as well as solution containing the host (2.0 mM). To NMR tube containing the host (0.5 mL, 2.0 mM, 1.0 eq) was added different portions of solutions containing racemic **8** and *S*-**8** (46.6 mM) to yield total 60.0  $\mu$ L (2.8 eq) of guest. (Higher equivalent rate was chosen to ease the calculation of *S*:*R* ratio and addition of analyte.)

Table 4. ee% determined from  $^1\text{H}$  NMR spectra

| <i>S</i> ( $\mu$ L) | <i>R/S</i> ( $\mu$ L) | Expected <i>S/R</i> | Measured <i>S/R</i> | Area <i>S</i> | Area <i>R</i> | Expected ee% ( <i>S</i> ) | Measured ee% ( <i>S</i> ) |
|---------------------|-----------------------|---------------------|---------------------|---------------|---------------|---------------------------|---------------------------|
| 0.0                 | 60.0                  | 1                   | 0.982591241         | 10594.285     | 10781.986     | 50                        | 49.56095944               |
| 10.0                | 50.0                  | 1.4                 | 1.445427826         | 13368.496     | 9248.816      | 58                        | 59.10735988               |
| 20.0                | 40.0                  | 2                   | 1.976496042         | 15224.866     | 7702.958      | 67                        | 66.40344936               |
| 30.0                | 30.0                  | 3                   | 3.020116878         | 16154.578     | 5348.991      | 75                        | 75.12510133               |
| 25.0                | 35.0                  | 3.8                 | 3.705853512         | 16159.793     | 4360.613      | 79                        | 78.74986976               |

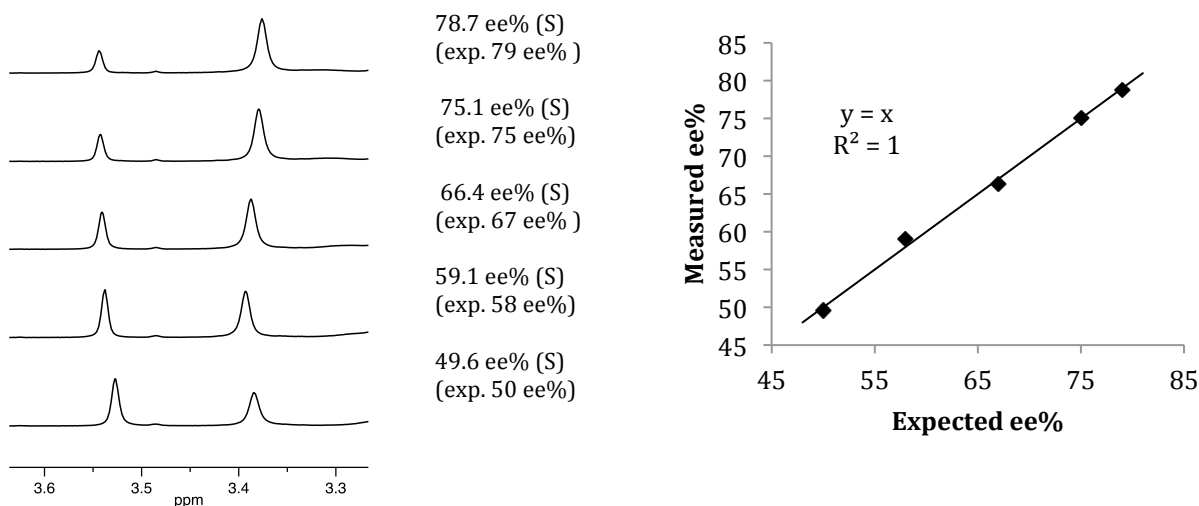

Figure 16. Results from ee% determination (<sup>1</sup>H NMR).

## 5 SEPARATION OF CARBOXYLIC ACIDS

### 5.1 Separation of carboxylic acids with 6a

In chiral recognition ability determination study of racemic carboxylic acids, solutions of different racemic carboxylic acids were prepared (2.0 mM). Experiment was performed by adding 11.0 μL of solution containing host (46.6 mM, 0.5 eq) to NMR tube containing 0.5 mL of guest (2.0 mM, 1.0 eq) and recorded spectra.

Table 5. Determination of the chemical shift difference between enantiomers ( $\Delta\delta$ ) of five racemic carboxylic acids in the presence of **6a**, using <sup>1</sup>H NMR (500 MHz) in CDCl<sub>3</sub> at 27 °C.

| No. | Racemic carboxylic acid | Actual multiplet | Spectra (if split is detected) | $\Delta\delta$ (ppm) |        |
|-----|-------------------------|------------------|--------------------------------|----------------------|--------|
|     |                         |                  |                                | 0.002                |        |
| 9a  |                         | H                | q                              |                      | 0.0052 |
|     |                         | CH <sub>2</sub>  | d                              |                      | 0.0062 |

|            |                                                                                     |    |   |                                                                                      |        |
|------------|-------------------------------------------------------------------------------------|----|---|--------------------------------------------------------------------------------------|--------|
| <b>10a</b> | 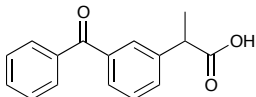   | Me | d |    | 0.014  |
|            |                                                                                     | H  | q | nd                                                                                   | nd     |
| <b>11a</b> |    | H  | s |    | 0.084  |
| <b>12a</b> |  | H  | q |   | 0.014  |
|            |                                                                                     | Me | d |  | 0.0062 |
| <b>13a</b> |  | H  | q |  | 0.01   |
|            |                                                                                     | NH | d |  | 0.052  |

|     |                                                                                     |    |       |                                                                                      |       |
|-----|-------------------------------------------------------------------------------------|----|-------|--------------------------------------------------------------------------------------|-------|
| 14a | 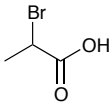   | Me | s     |    | 0.033 |
|     |                                                                                     | H  | q     |    | 0.014 |
|     |                                                                                     | Me | d     |   | 0.077 |
|     |                                                                                     | H  | t     |  | 0.016 |
| 15a |  | NH | br. s |  | 0.088 |

## 5.2 Separation of carboxylic acids with 6b

In chiral recognition ability determination study of racemic carboxylic acids, solutions of different  $[\text{Bu}_4\text{N}]^+$  salts of carboxylic acids were prepared (46.6 mM). Experiment was performed by adding 22.5  $\mu\text{L}$  of solution containing guest to NMR tube containing 0.5 mL of host (2.0 mM, 1.0 eq) and recorded spectra.

Table 6. Determination of the chemical shift difference between enantiomers ( $\Delta\delta$ ) of five racemic carboxylic acid  $[\text{Bu}_4\text{N}]^+$  salts in the presence of **6**, using  $^1\text{H}$  NMR (500 MHz) in  $\text{CDCl}_3$  at 27  $^\circ\text{C}$ .



| No. | [Bu <sub>4</sub> N] <sup>+</sup> salt of racemic carboxylic acid                    | Actual multiplet | Spectra                                                                               | Δδ (ppm) |
|-----|-------------------------------------------------------------------------------------|------------------|---------------------------------------------------------------------------------------|----------|
| 9b  | 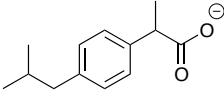   | Me               |    | 0.0099   |
|     |                                                                                     | H                |    | 0.0053   |
|     |                                                                                     | CH <sub>2</sub>  | -                                                                                     | -[a]     |
| 10b |   | Me               |   | 0.01     |
|     |                                                                                     | H                | nd                                                                                    | nd       |
|     |                                                                                     |                  |                                                                                       |          |
| 11b |  | H                |  | 0.10     |
| 12b |  | H                |  | 0.038    |
|     |                                                                                     | Me               | -                                                                                     | -[a]     |
|     |                                                                                     |                  |                                                                                       |          |
| 13b |                                                                                     | H                | nd                                                                                    | nd       |

|            |  |    |       |   |       |
|------------|--|----|-------|---|-------|
|            |  | NH | d     |   | 0.051 |
|            |  | Me | s     |   | 0.033 |
| <b>14a</b> |  | H  | q     |   | 0.016 |
|            |  | Me | d     | - | -[a]  |
| <b>15a</b> |  | H  | t     |   | 0.017 |
|            |  | NH | br. s |   | 0.072 |

[a] Peaks overlapped, nd (resolution not detected)

## 6 NMR SPECTRA OF SYNTHESISED CSAS

# 1H, 13C and HSQC spectra of compound 1a

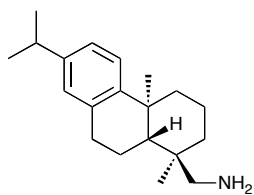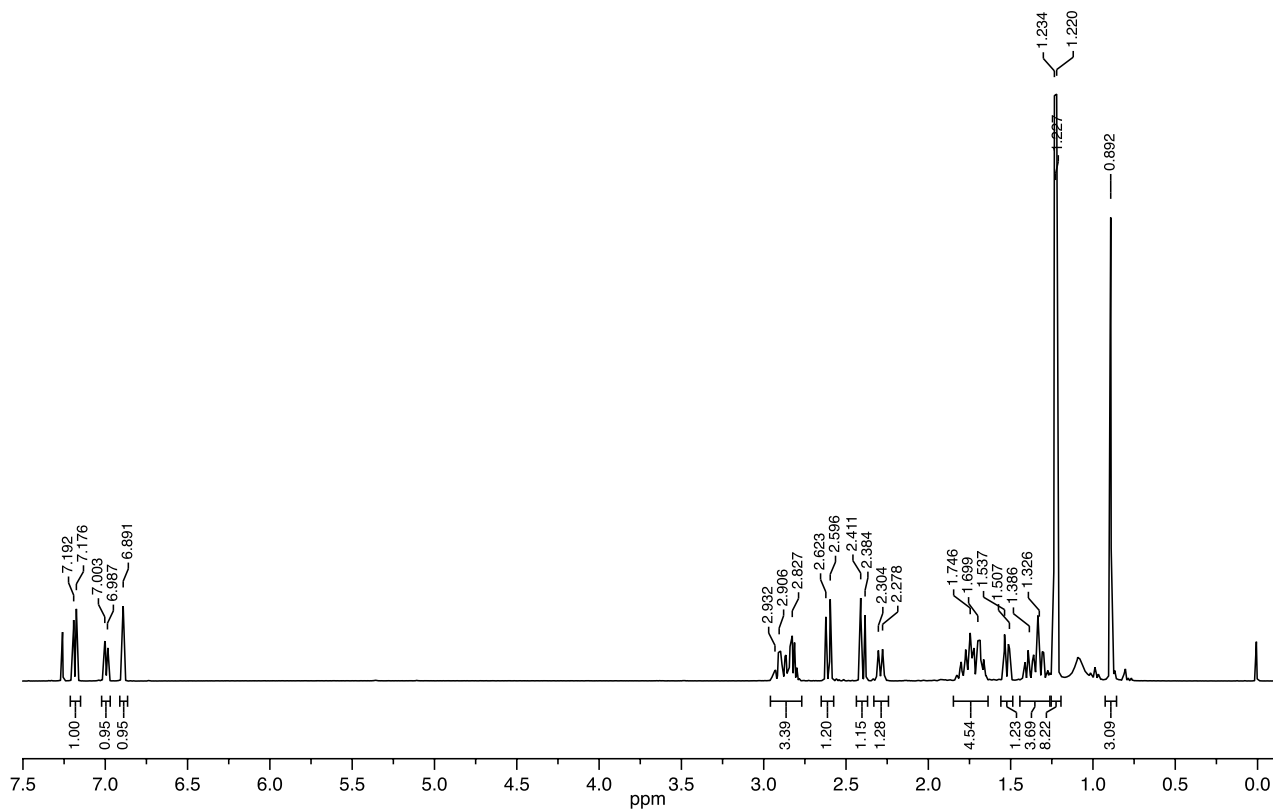

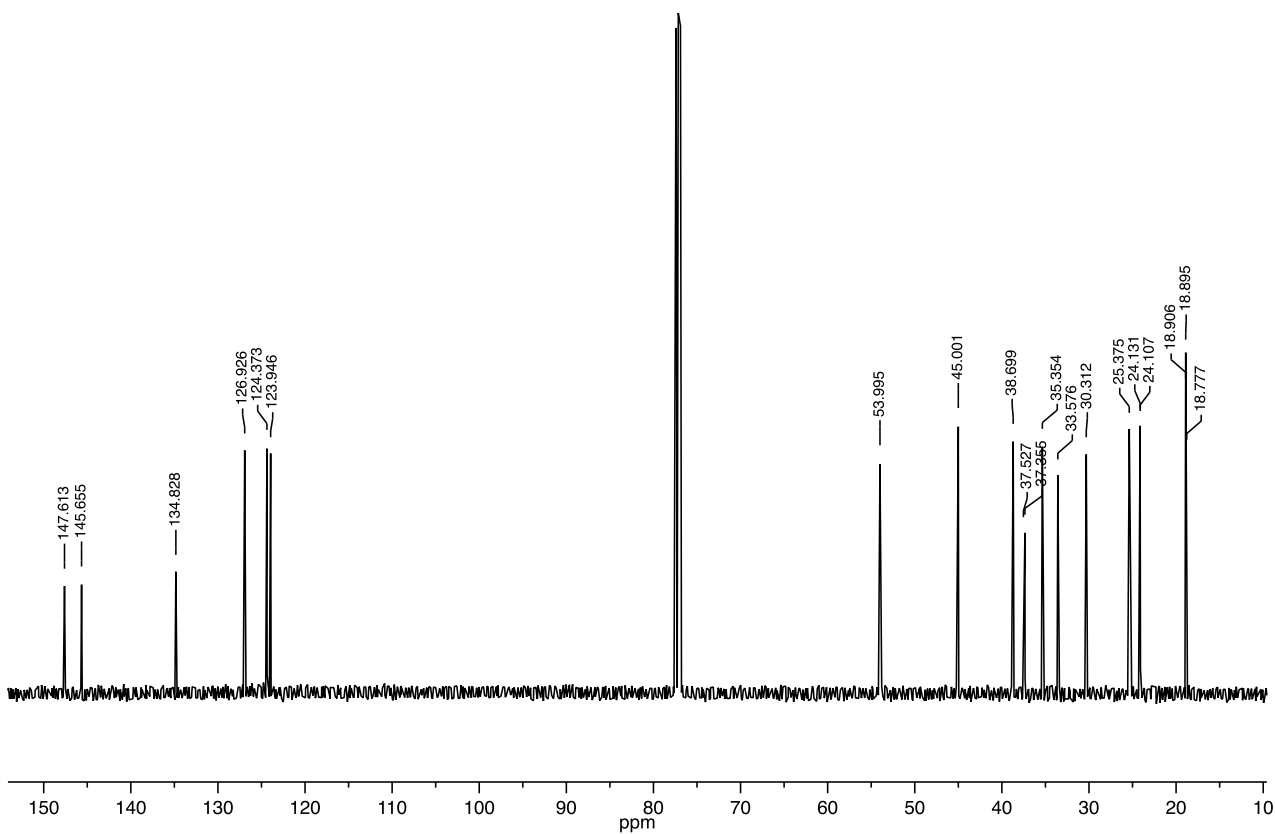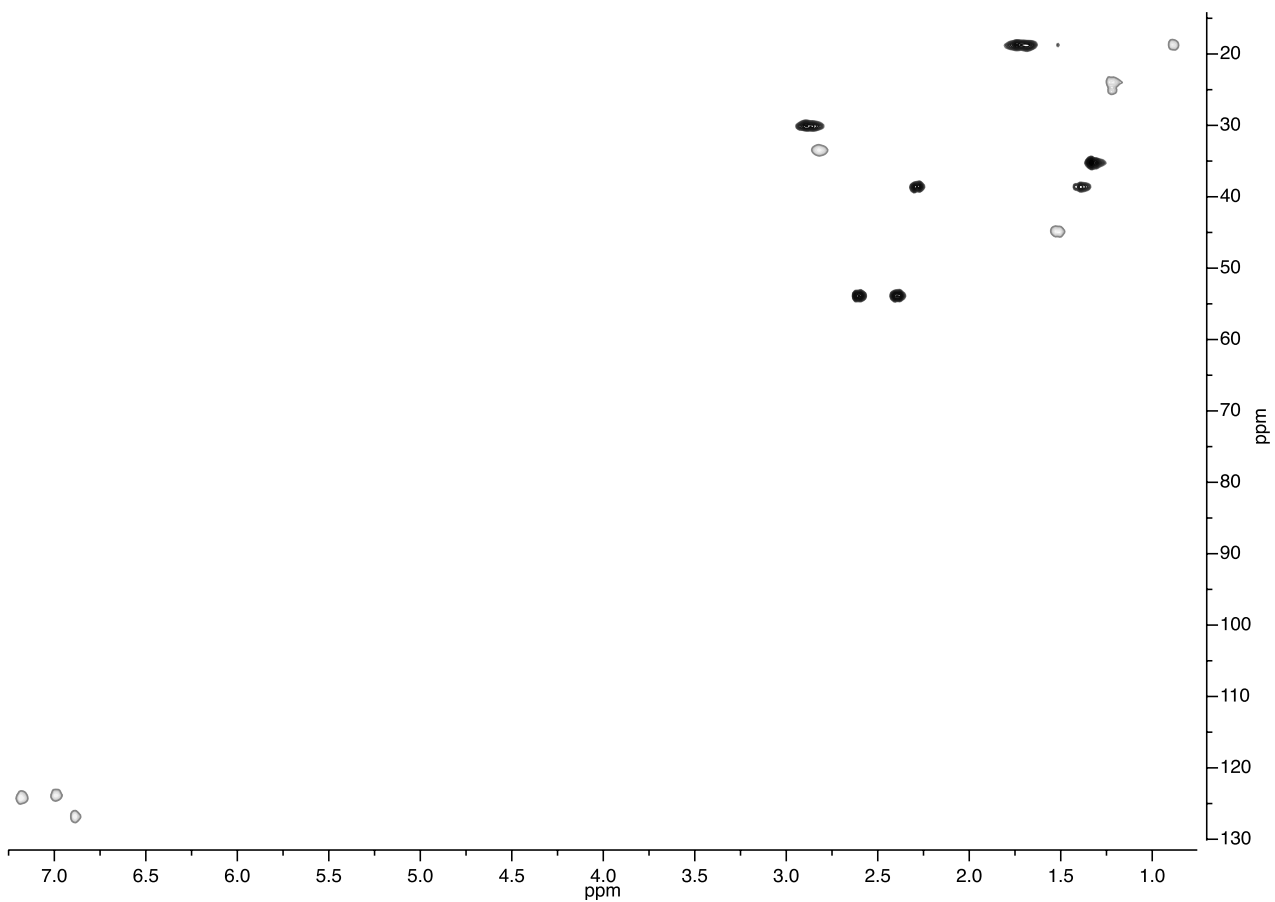

# 1H, 13C and HSQC spectra of compound 1b

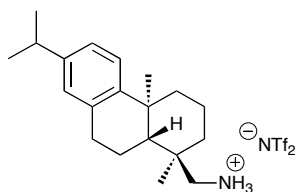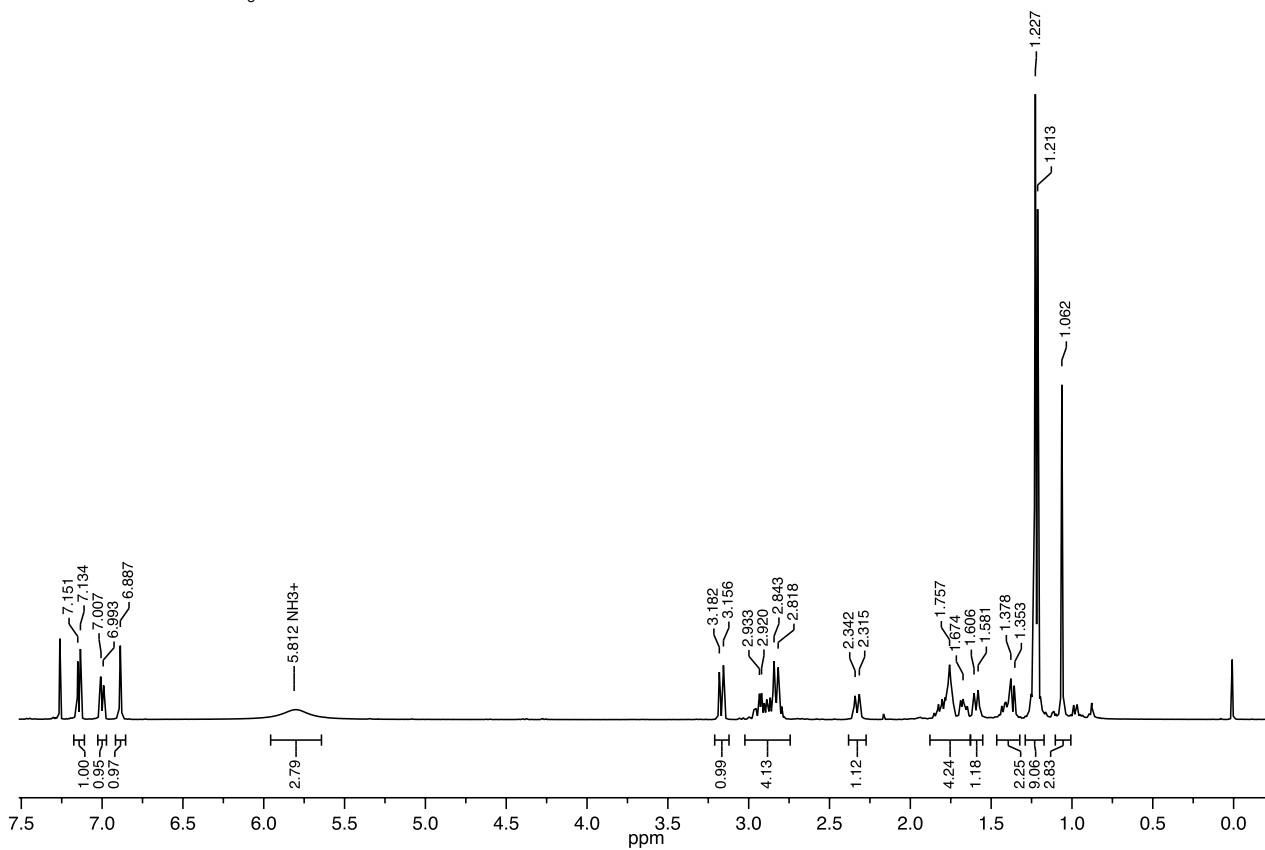

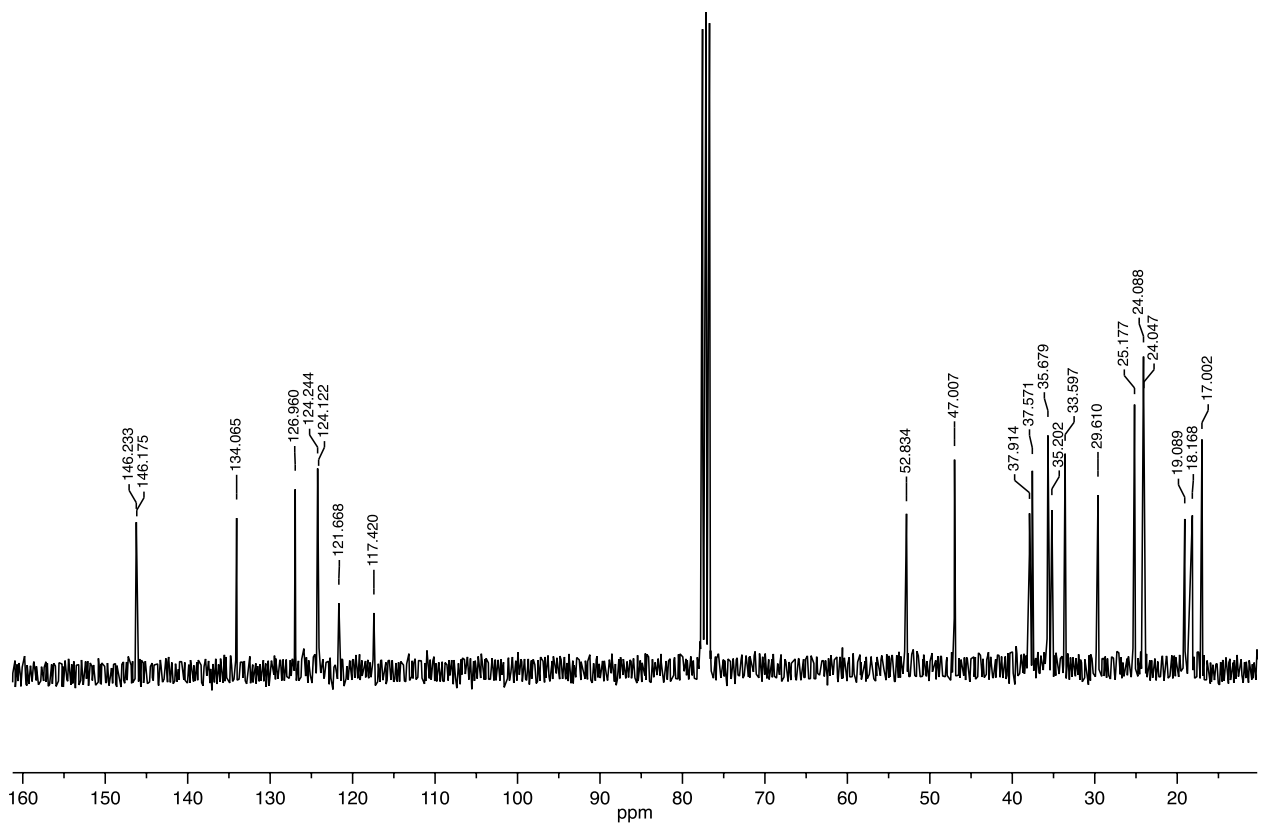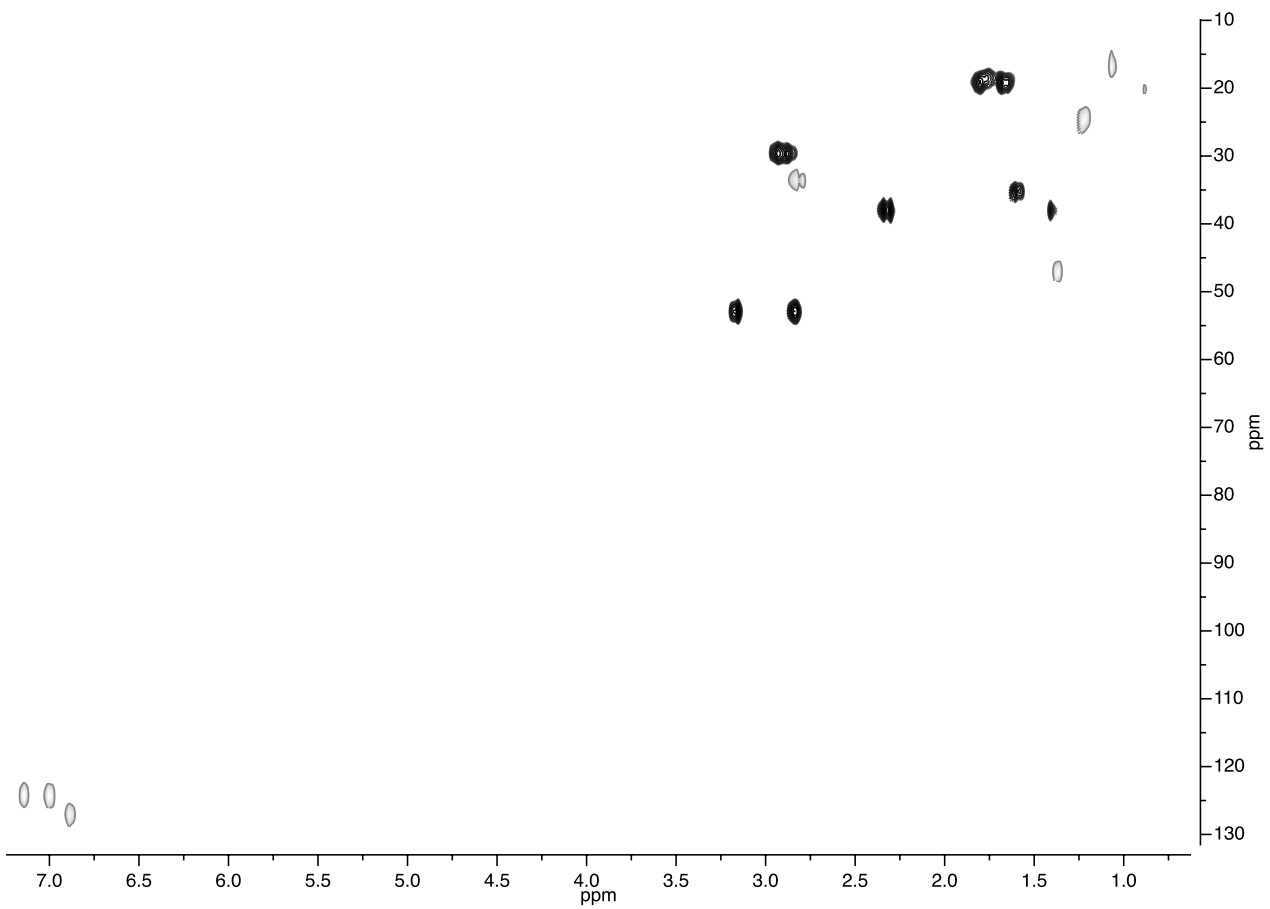

# 1H, 13C and HSQC spectra of compound 2a

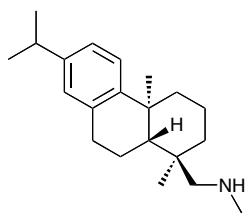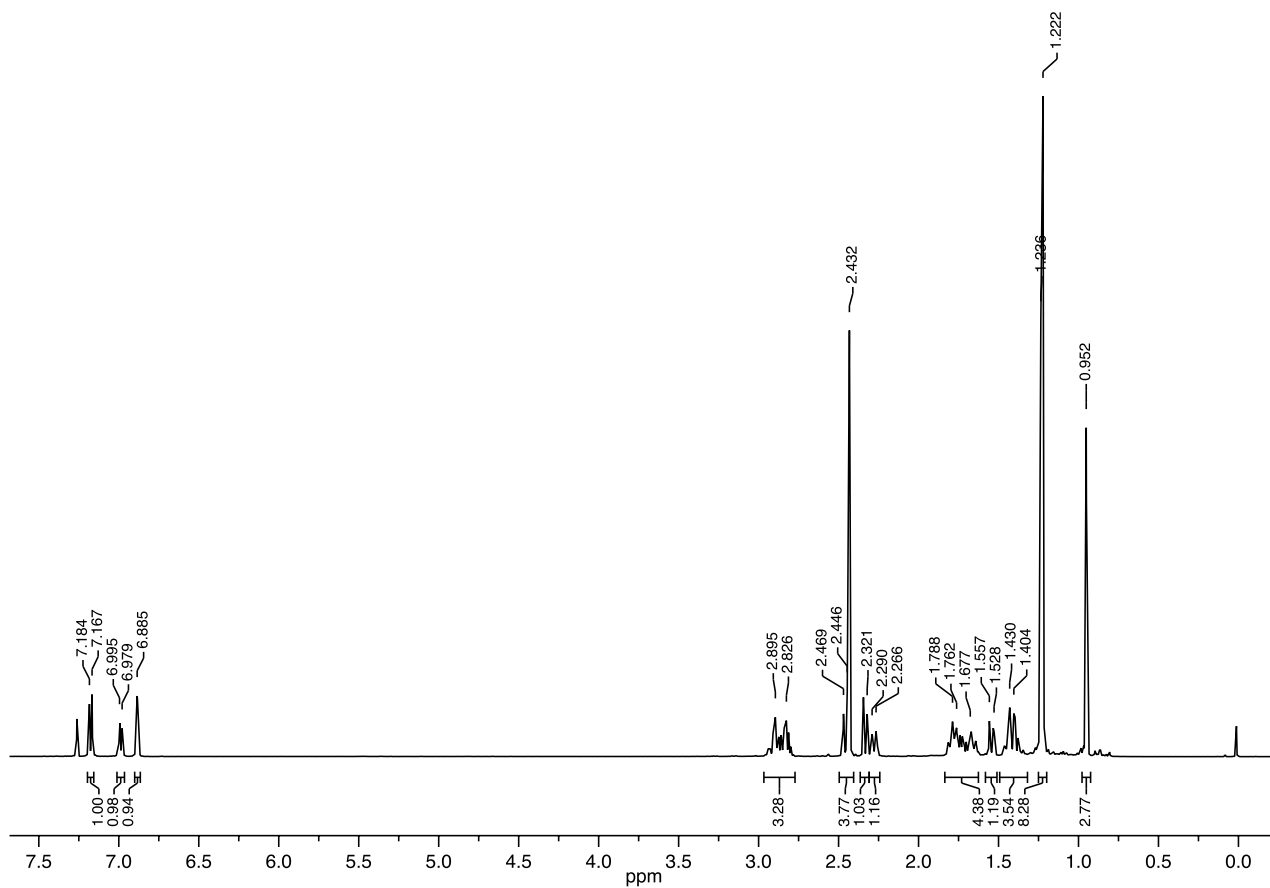

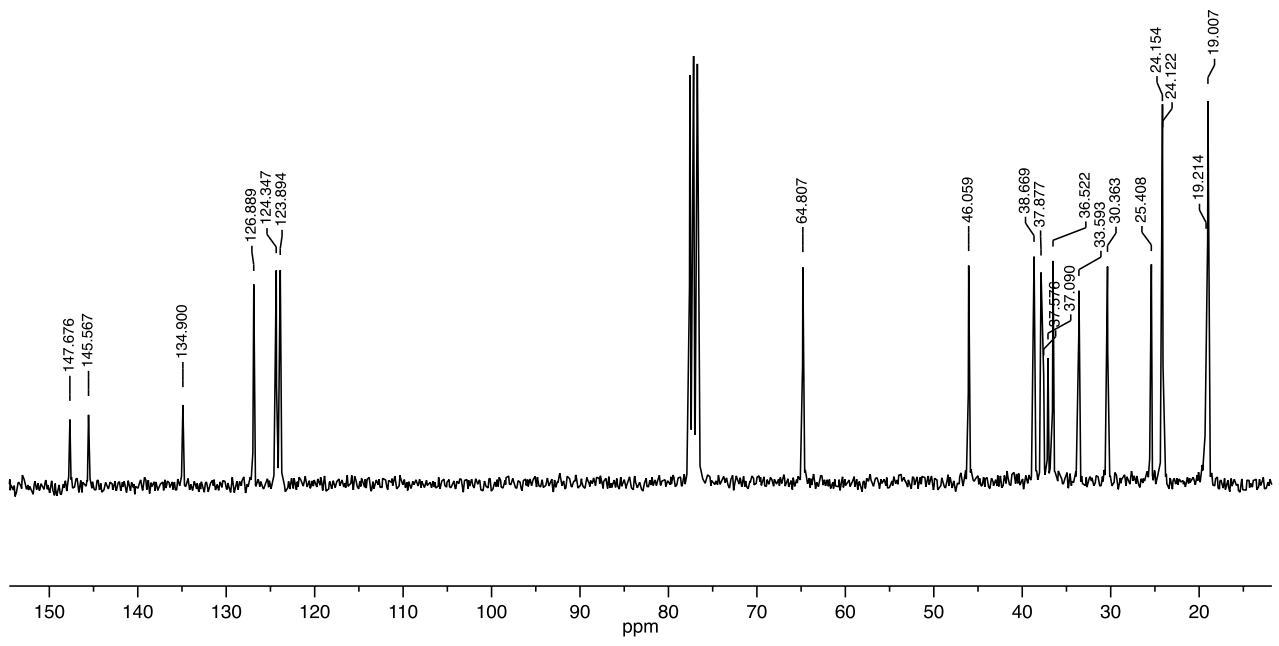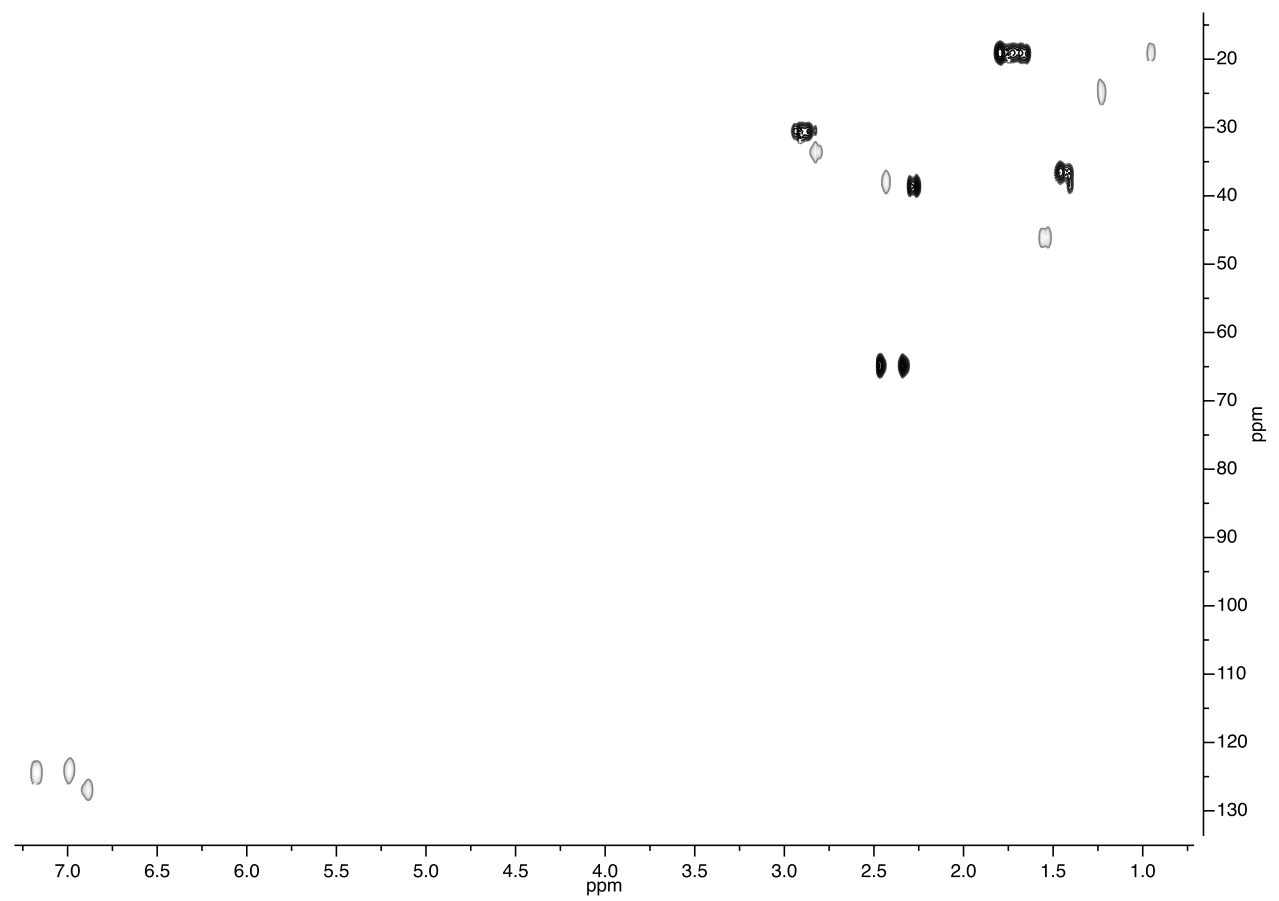



# 1H, 13C and HSQC spectra of compound 2b

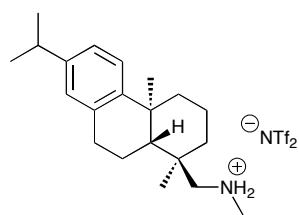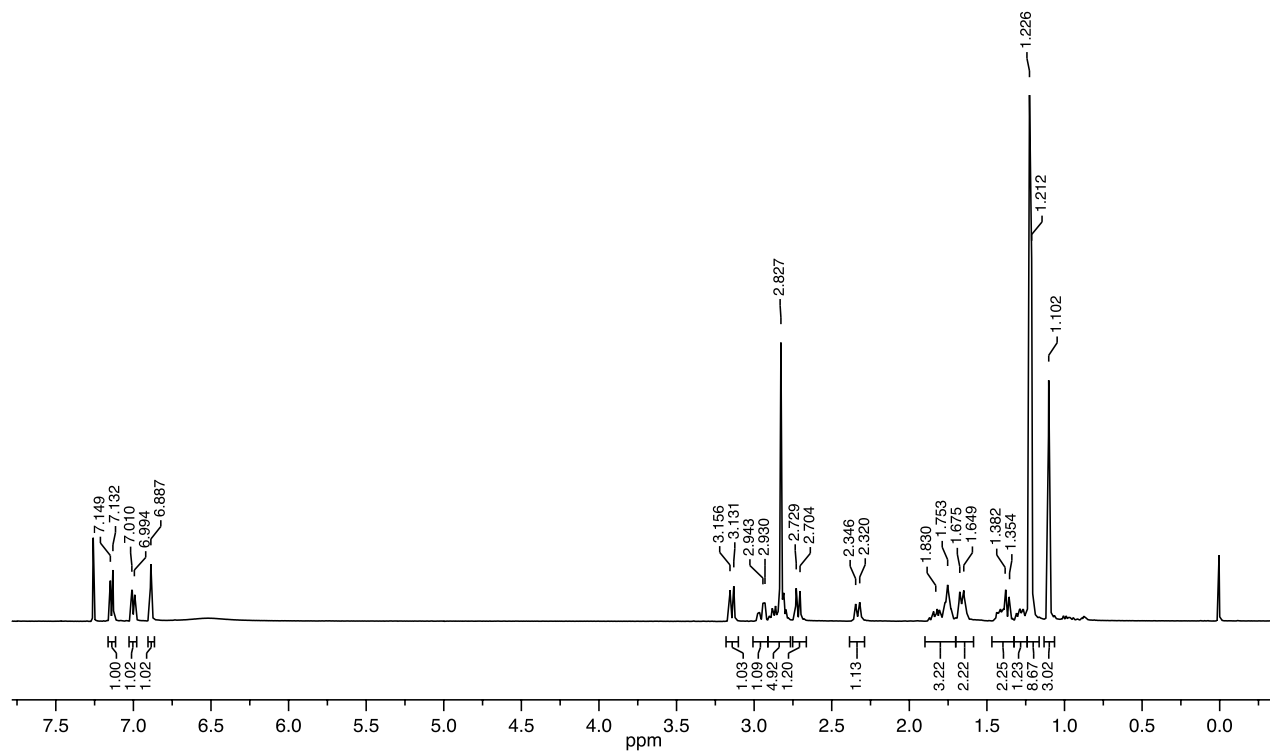

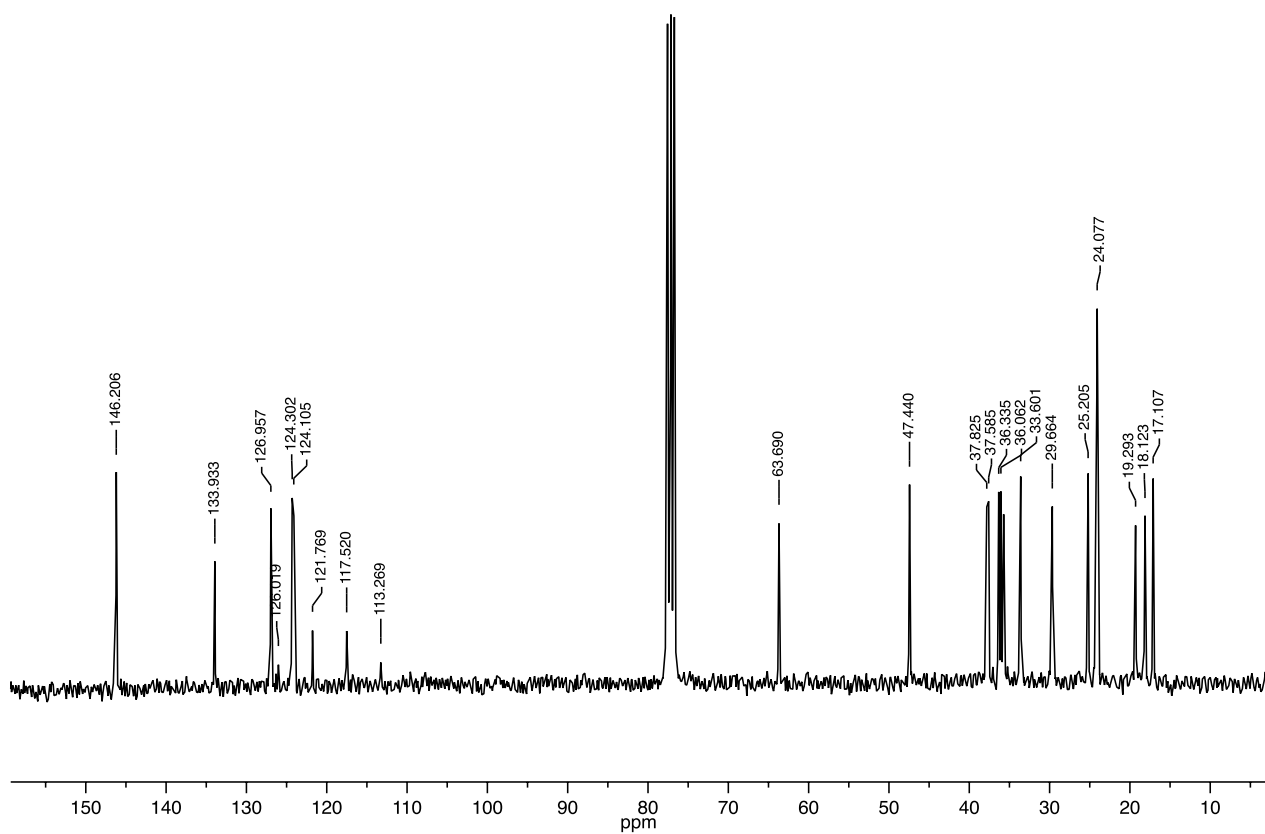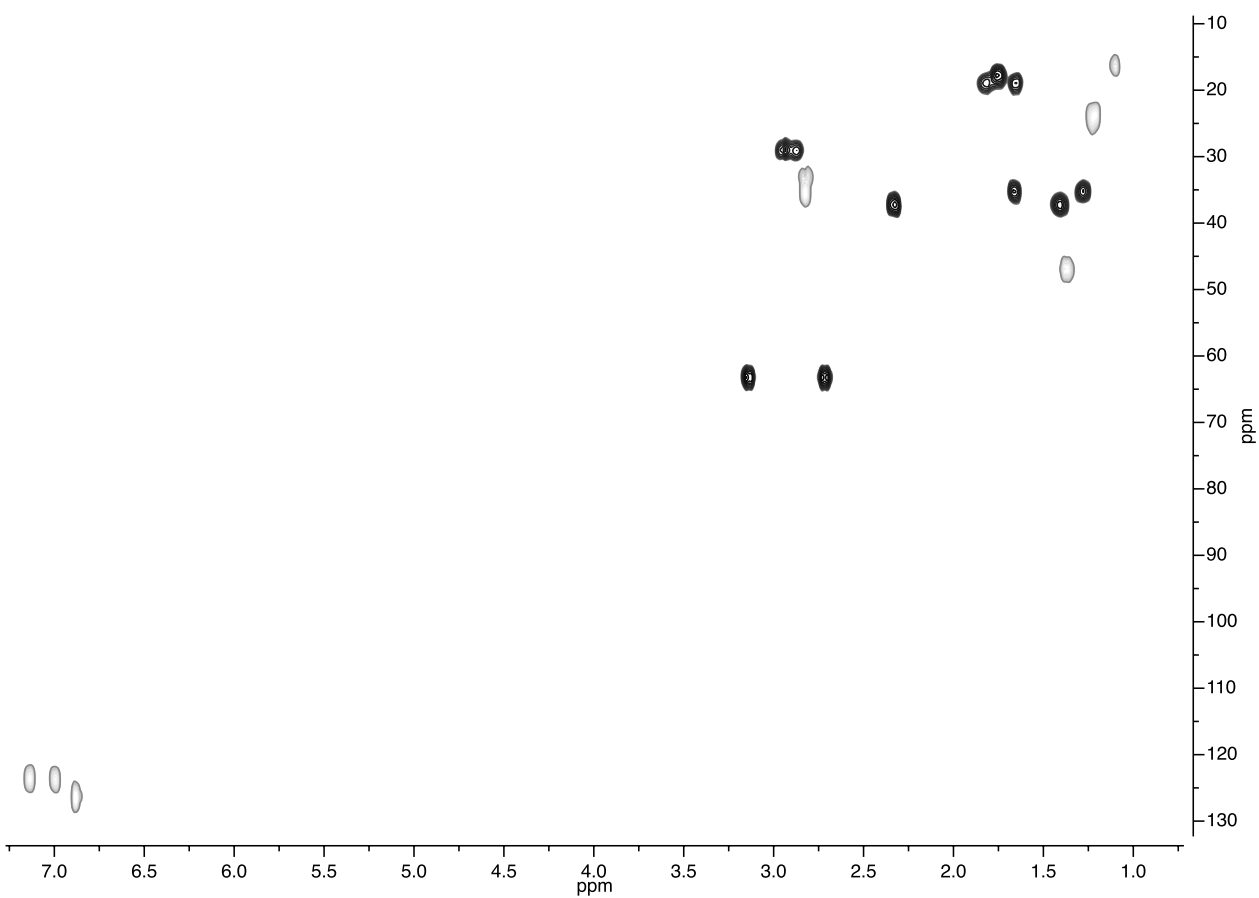

# 1H, 13C and HSQC spectra of compound 3a

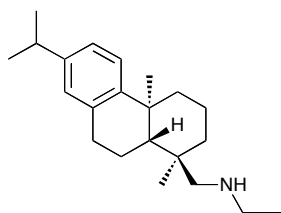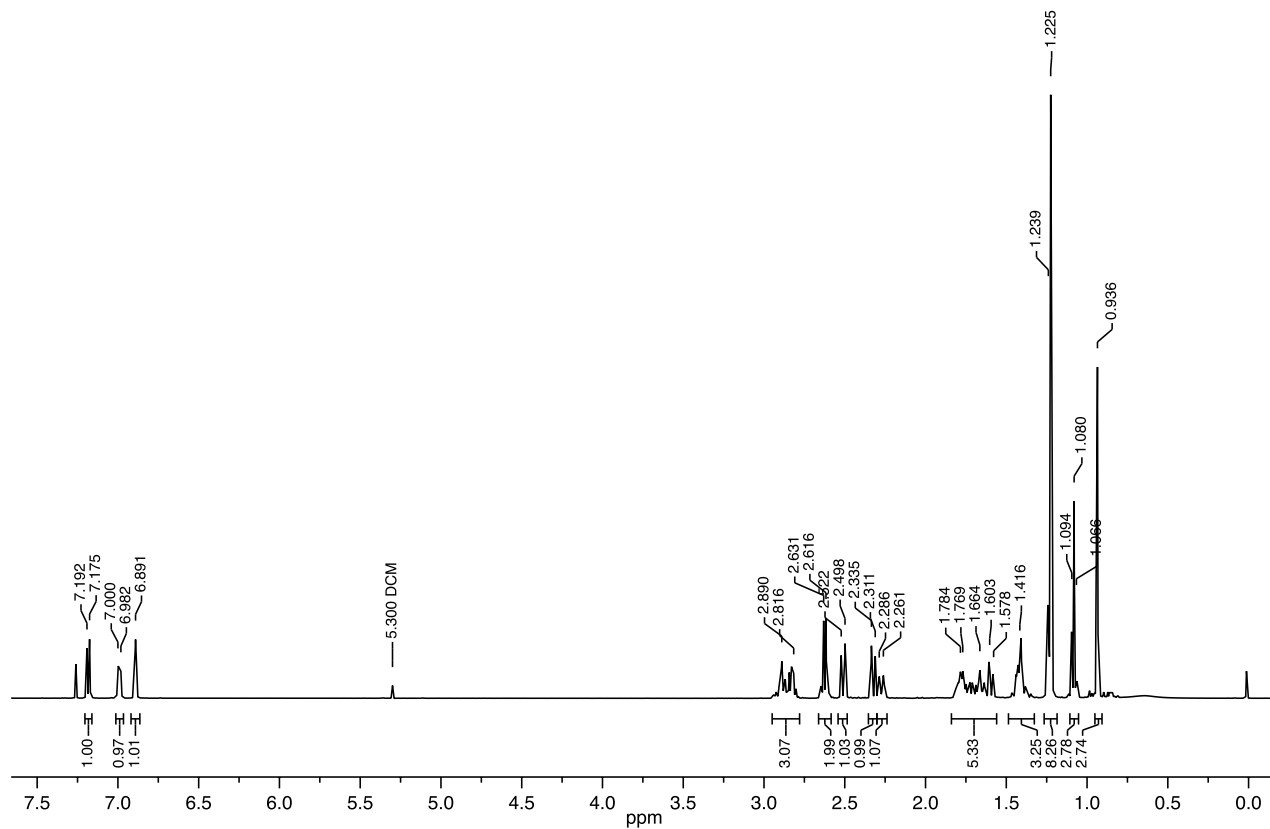

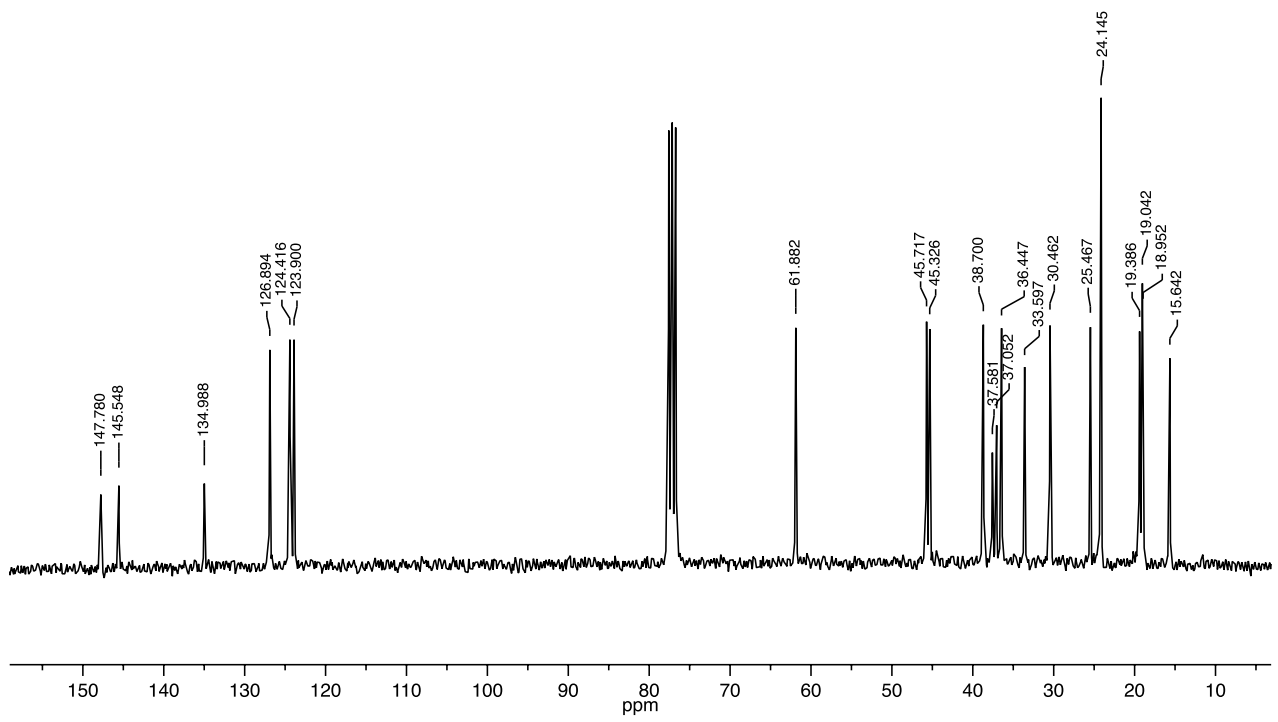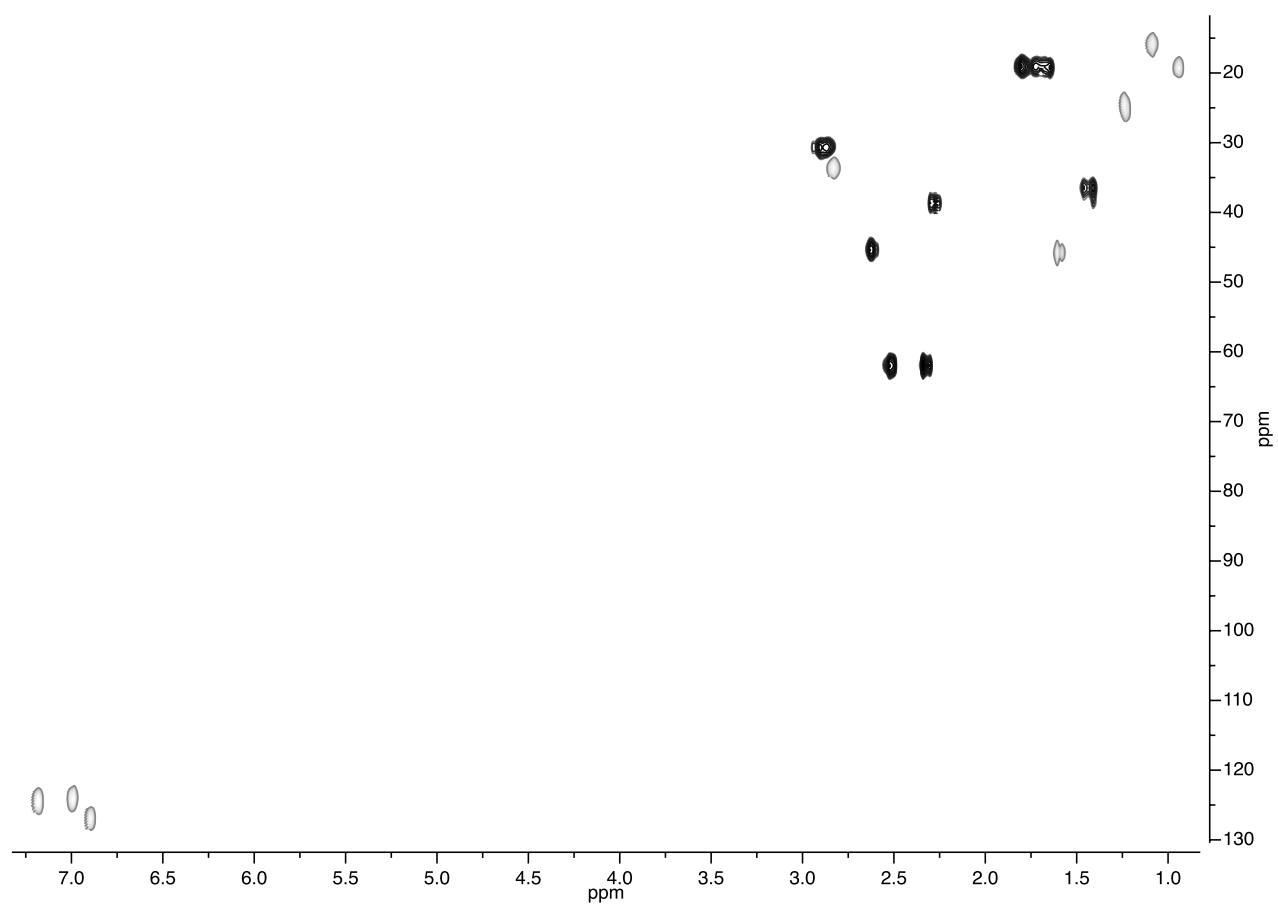

# 1H, 13C and HSQC spectra of compound 3b

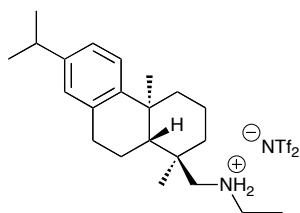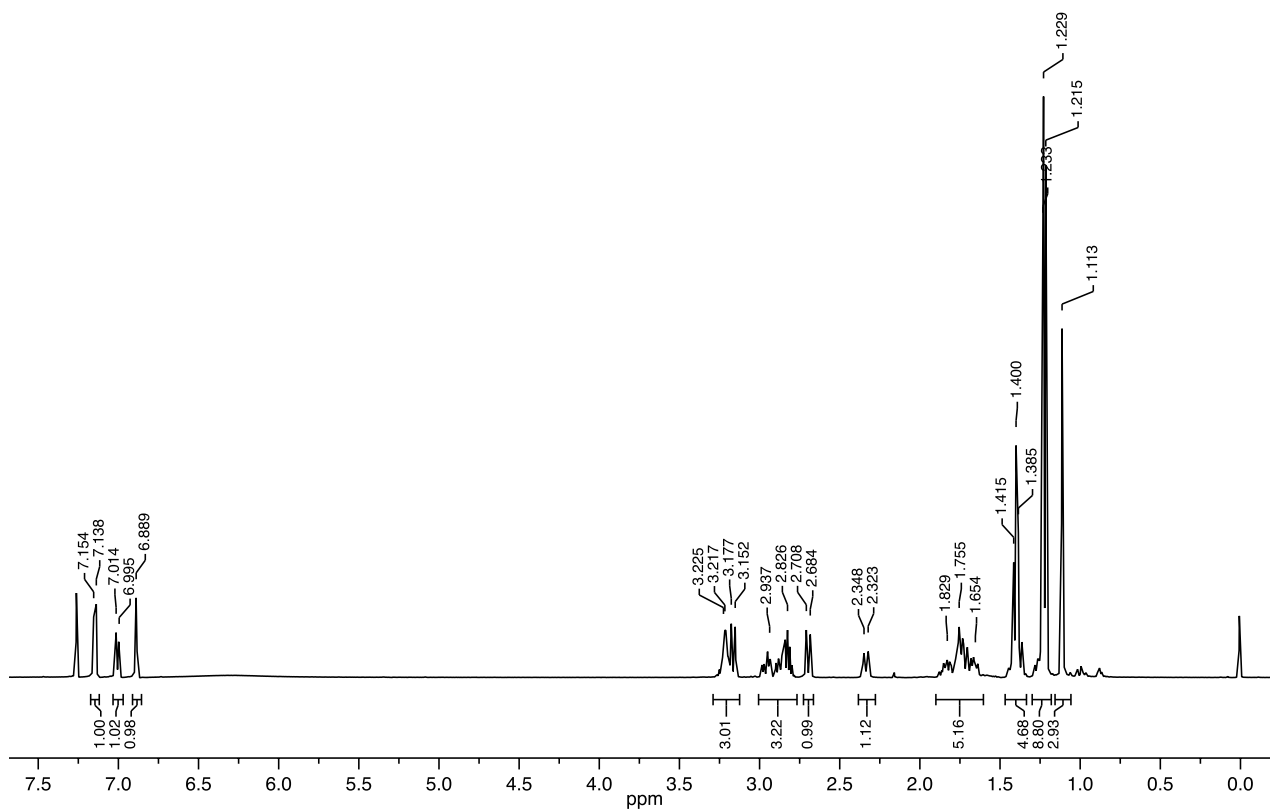

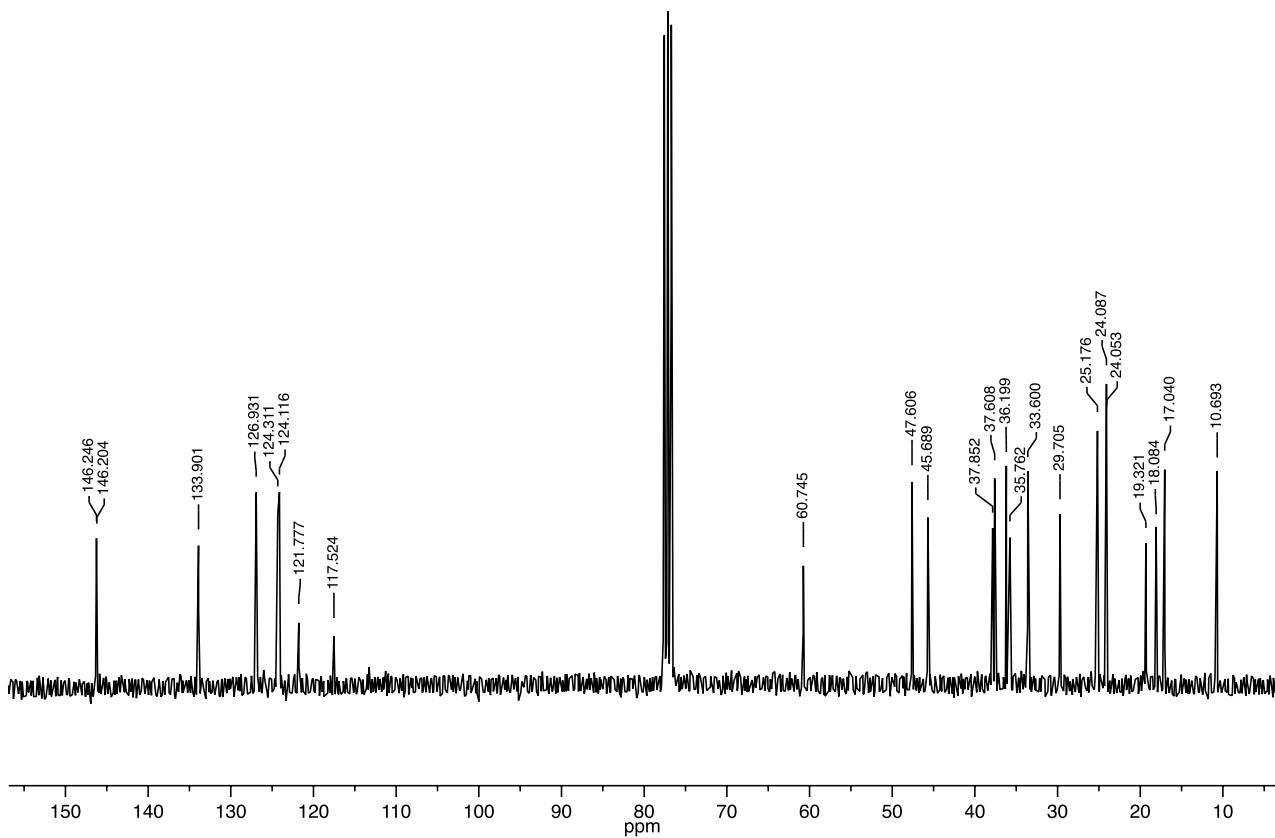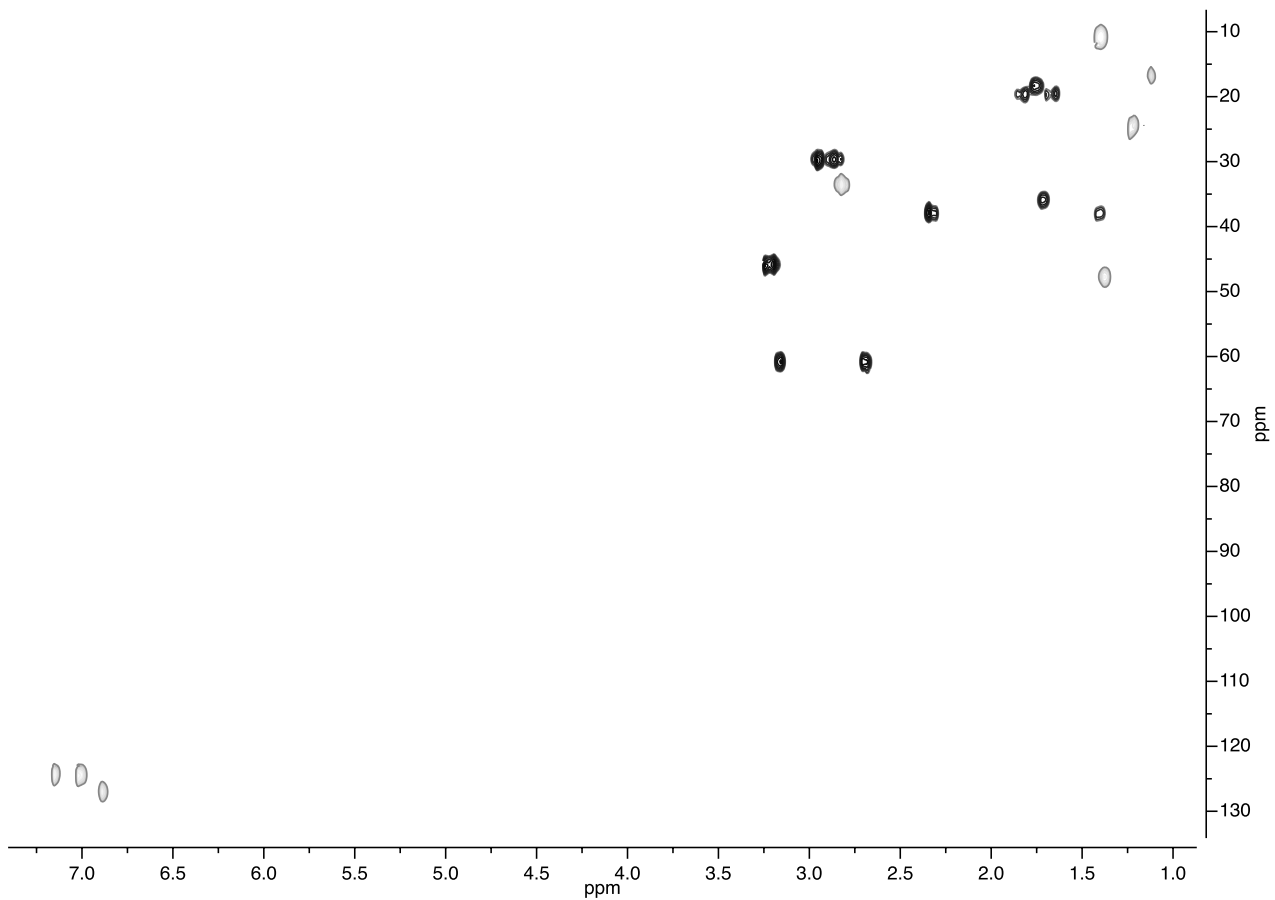

# **<sup>1</sup>H, <sup>13</sup>C and HSQC spectra of compound 4a**

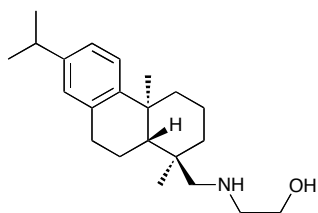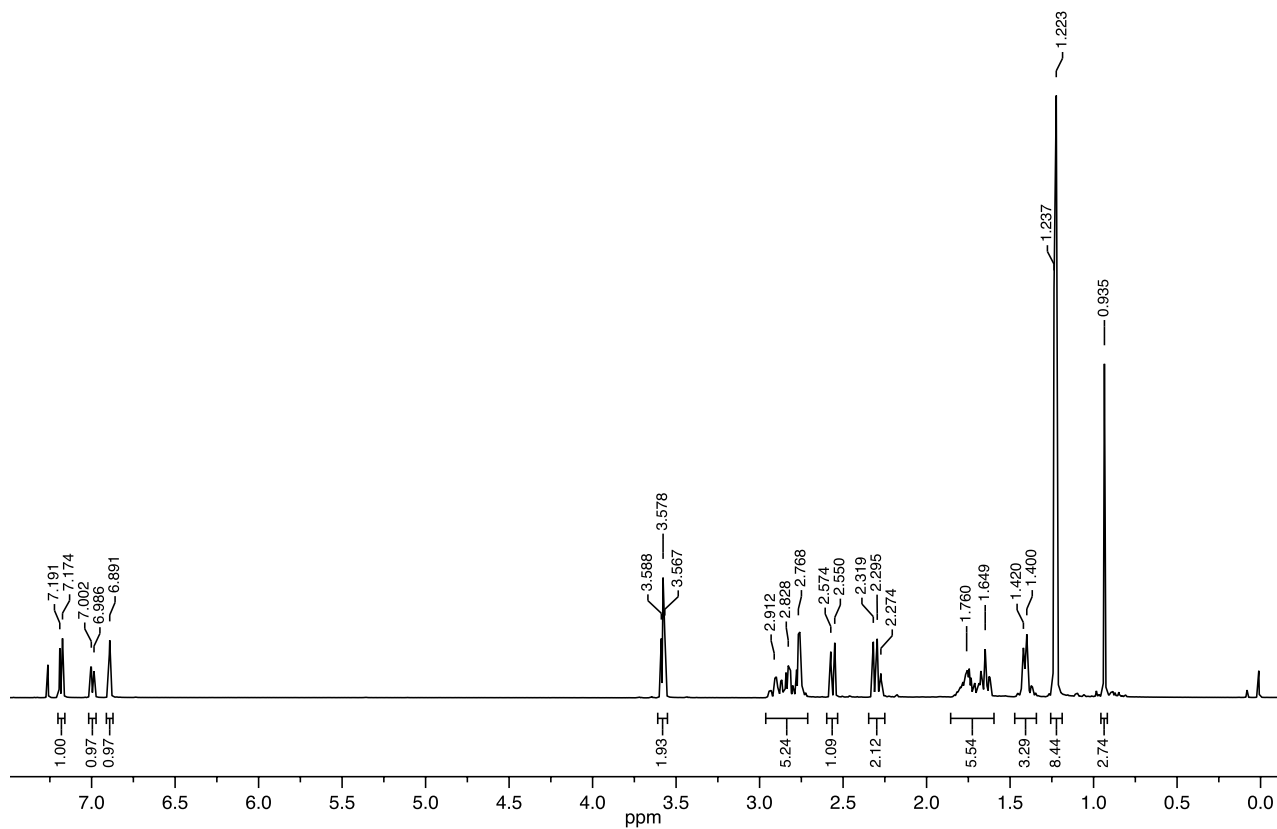

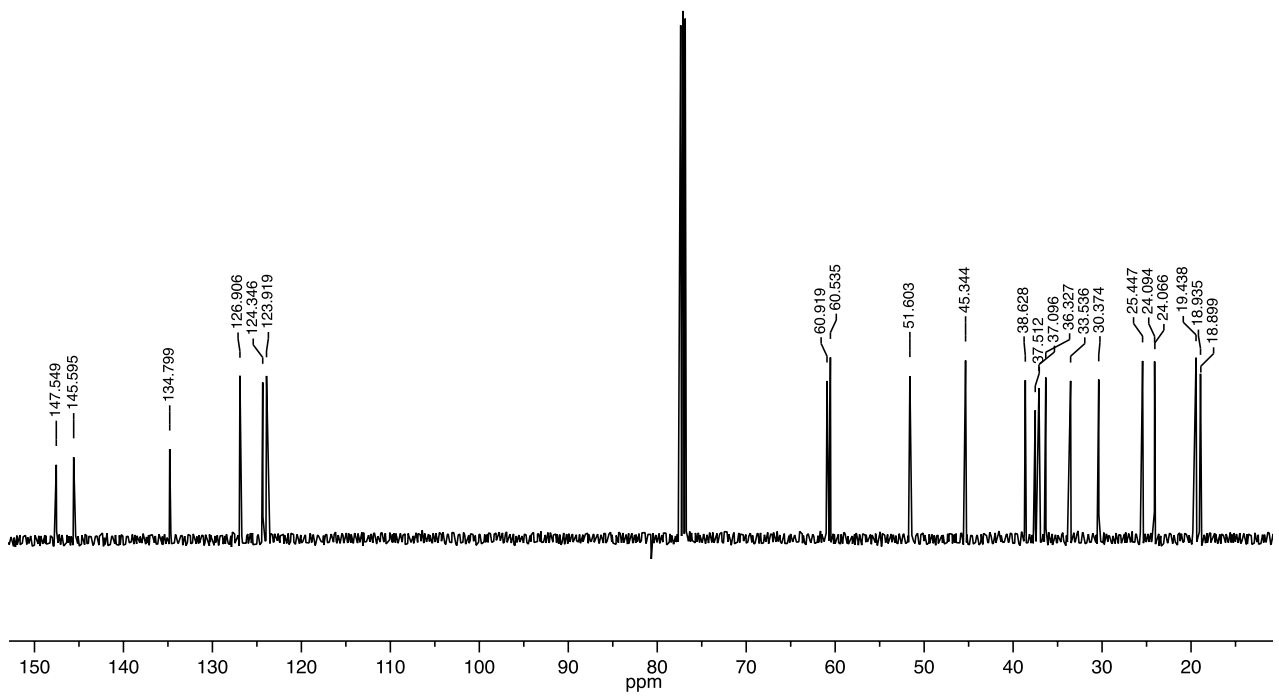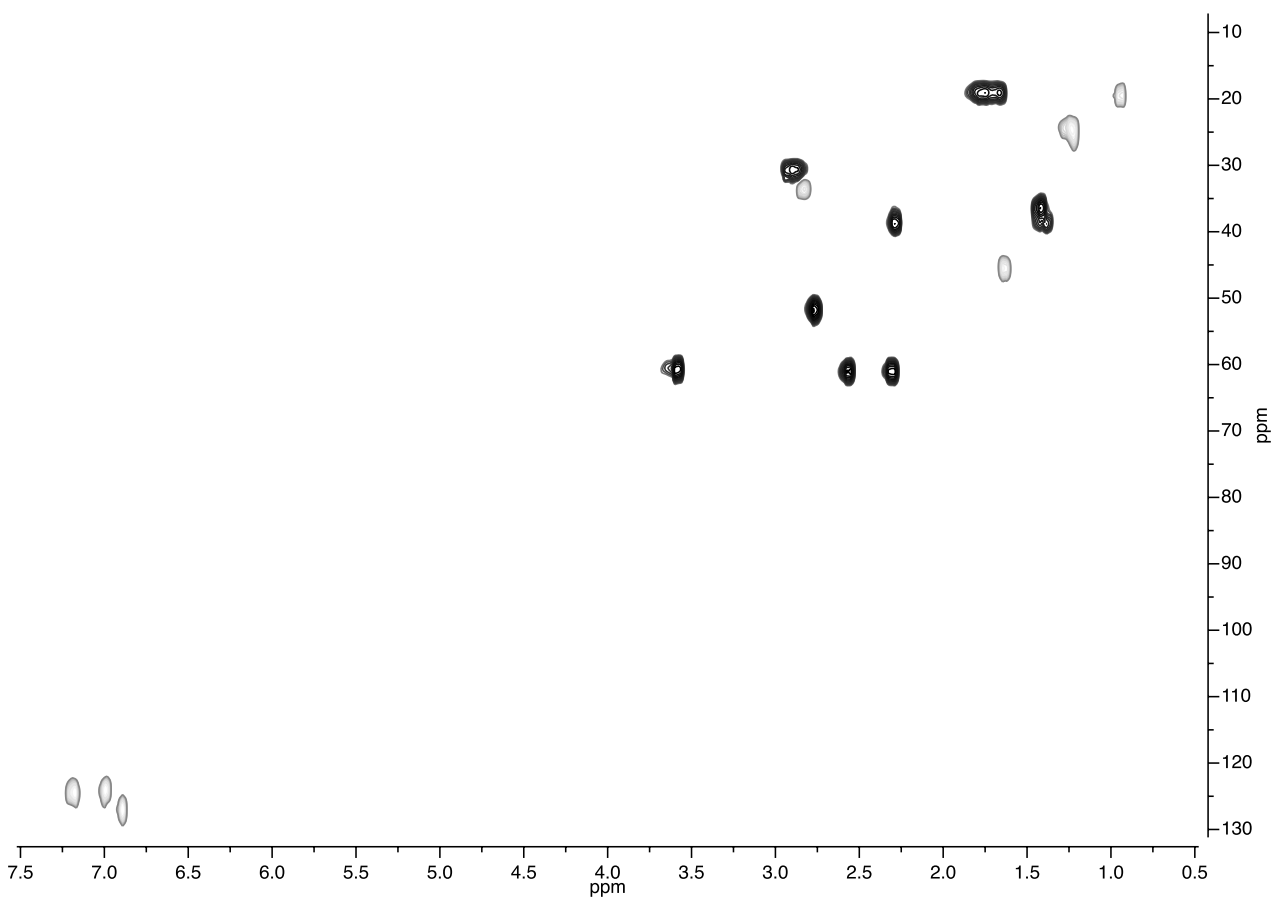



# 1H, 13C and HSQC spectra of compound 4b

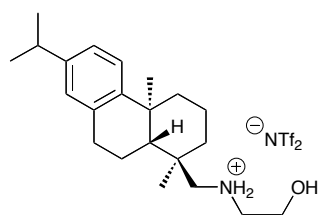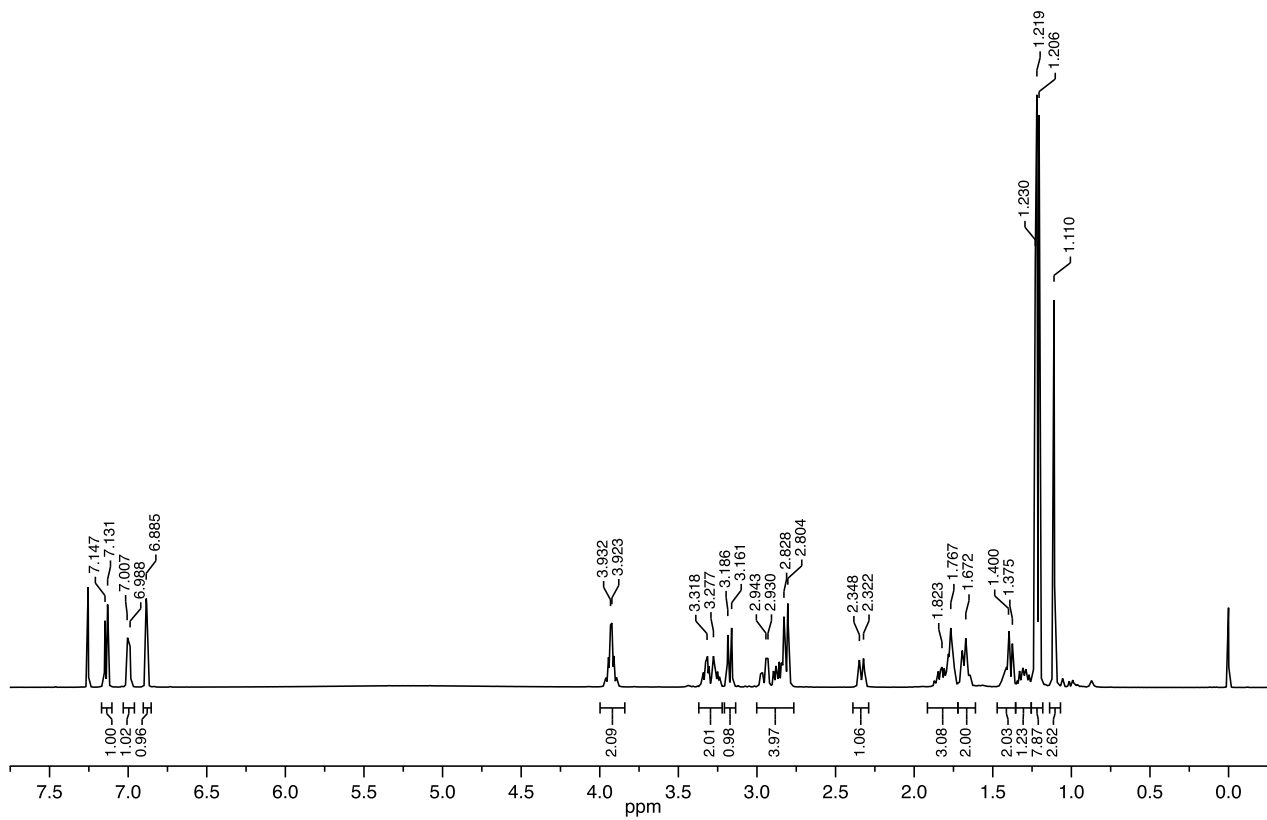

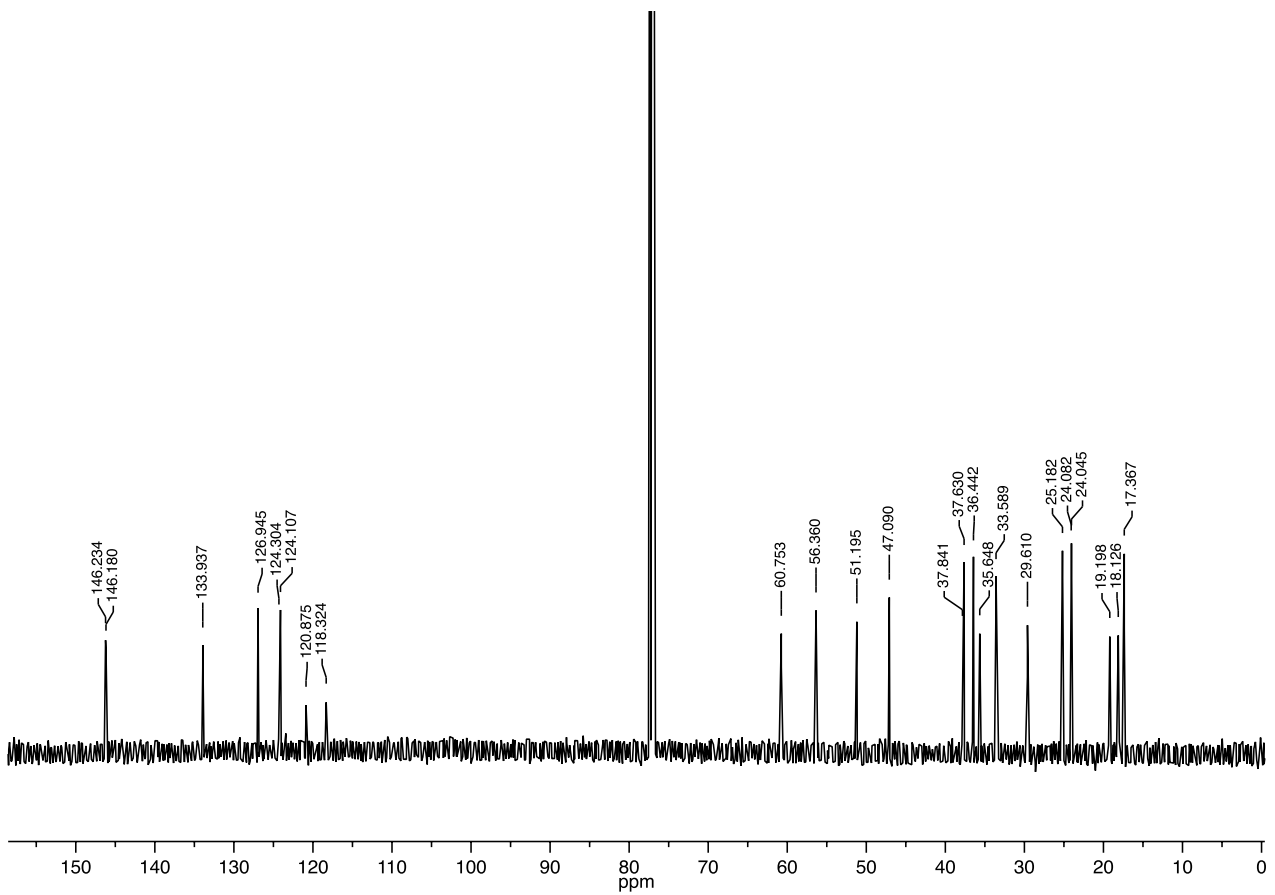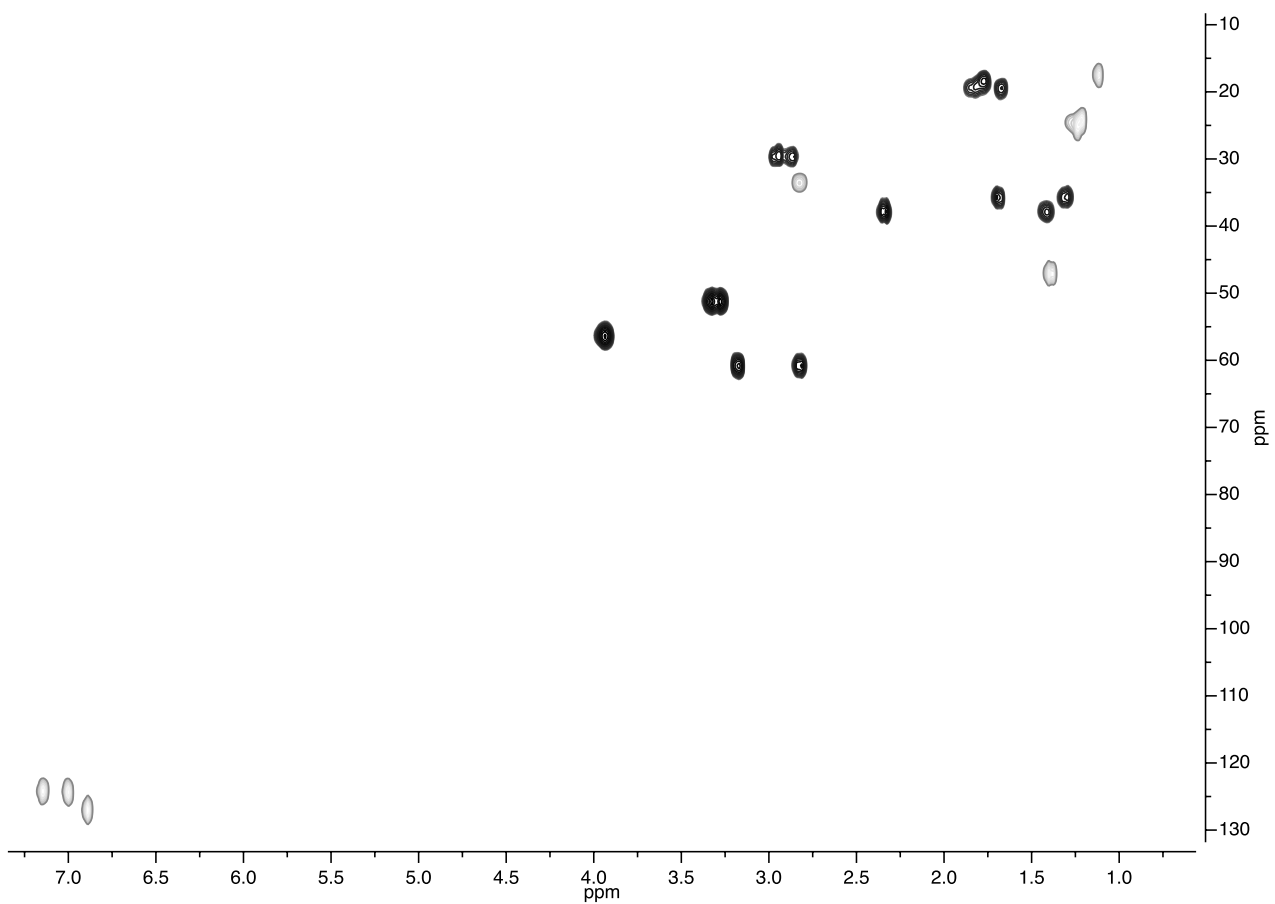

# 1H, 13C and HSQC spectra of compound 5a

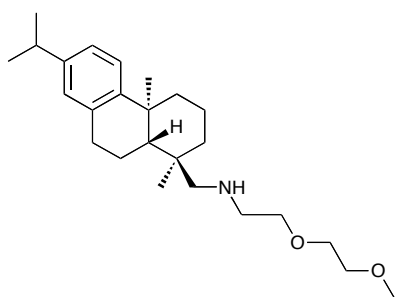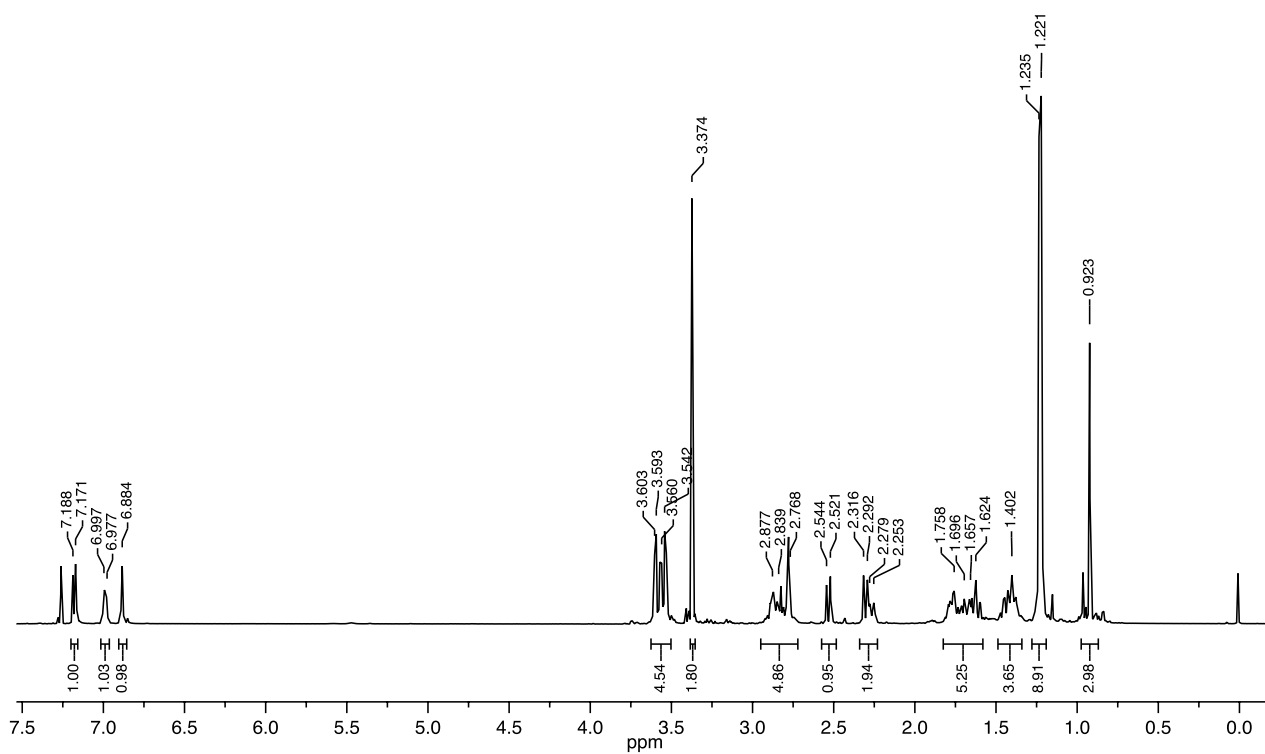

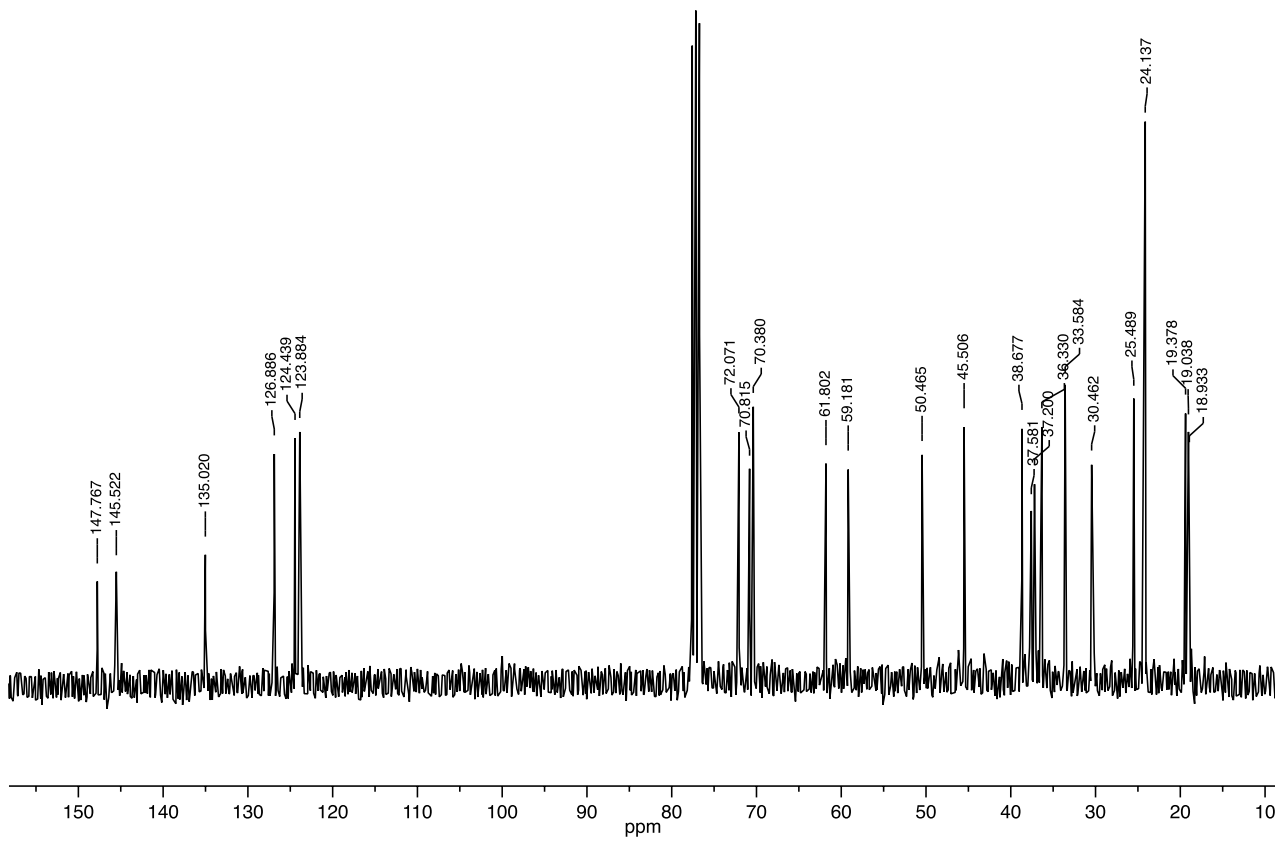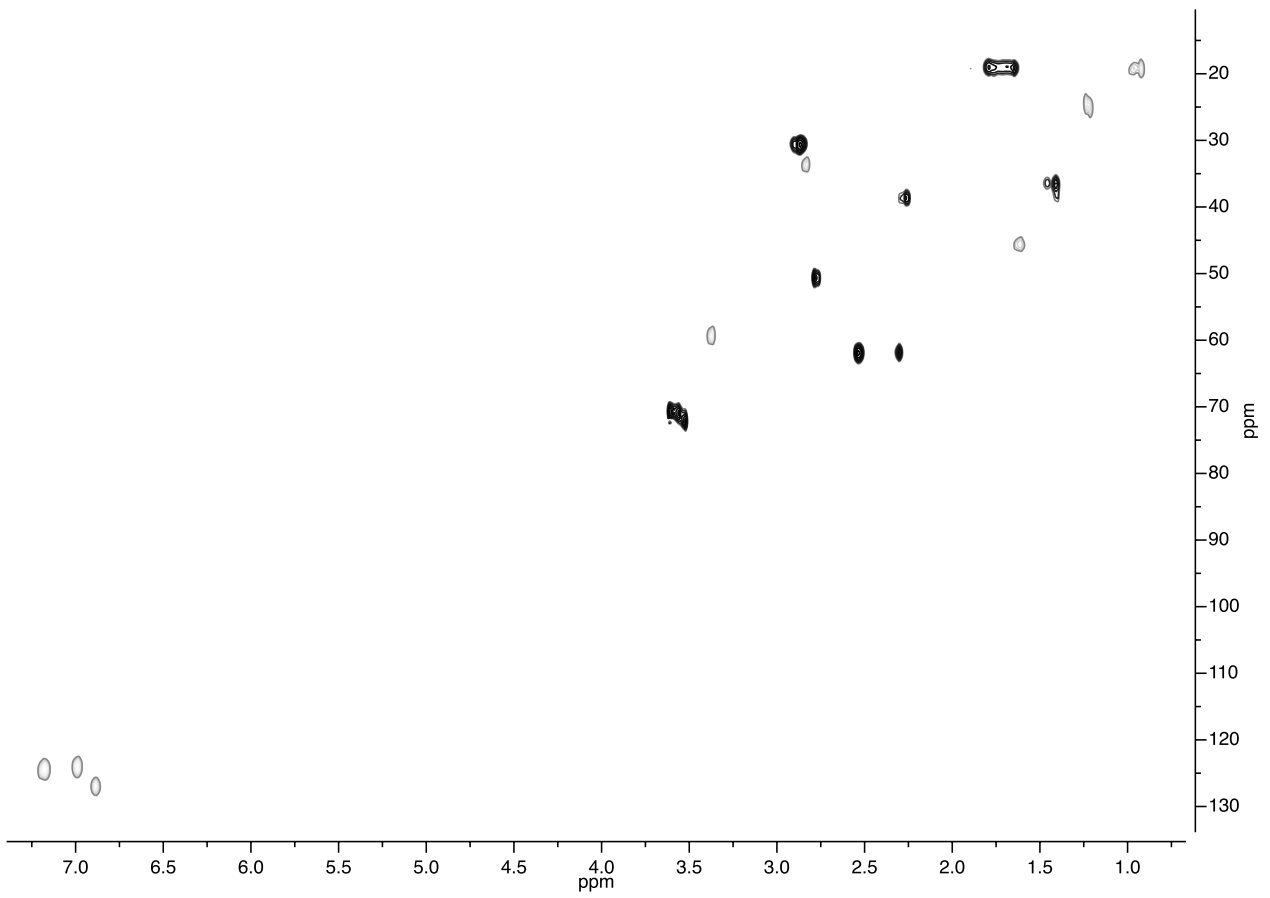

# 1H, 13C and HSQC spectra of compound 5b

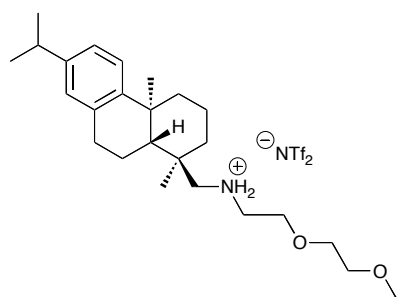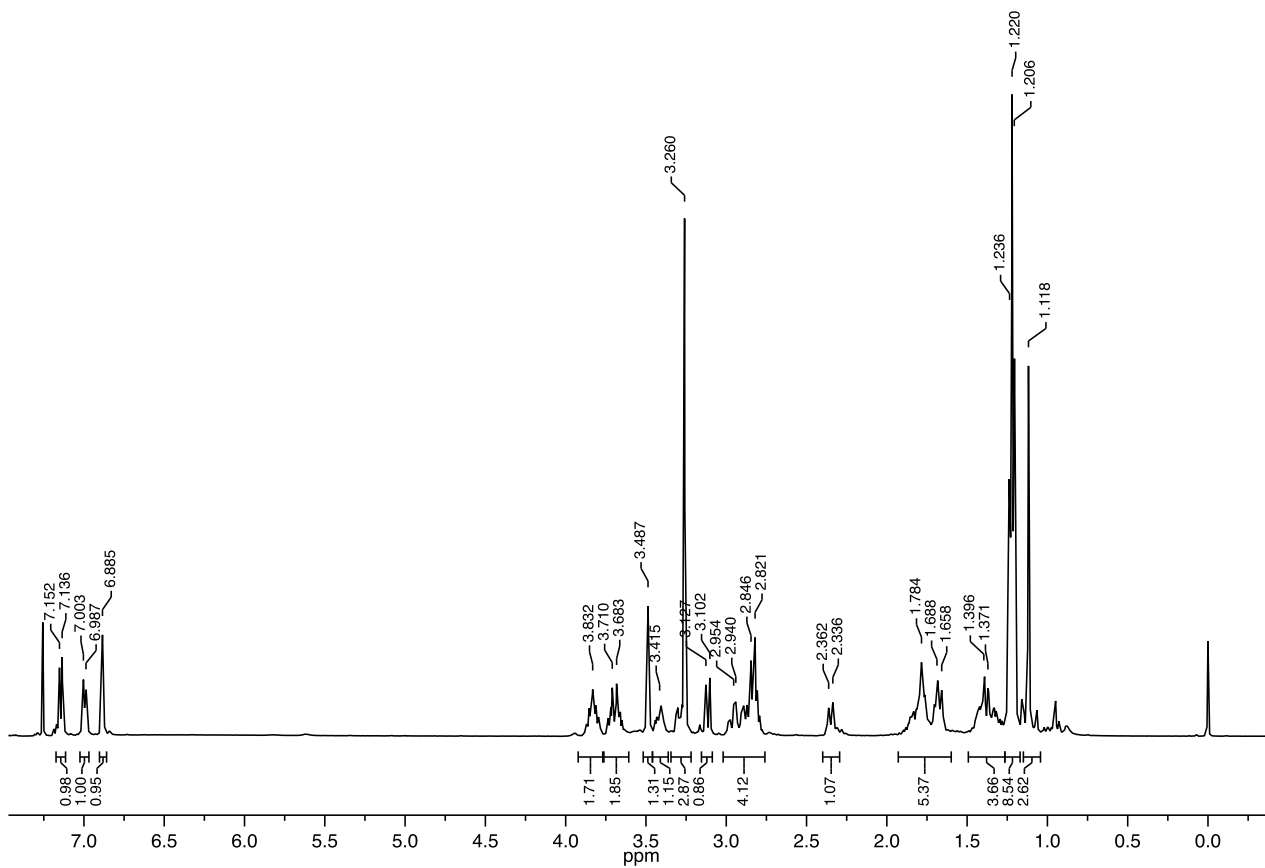

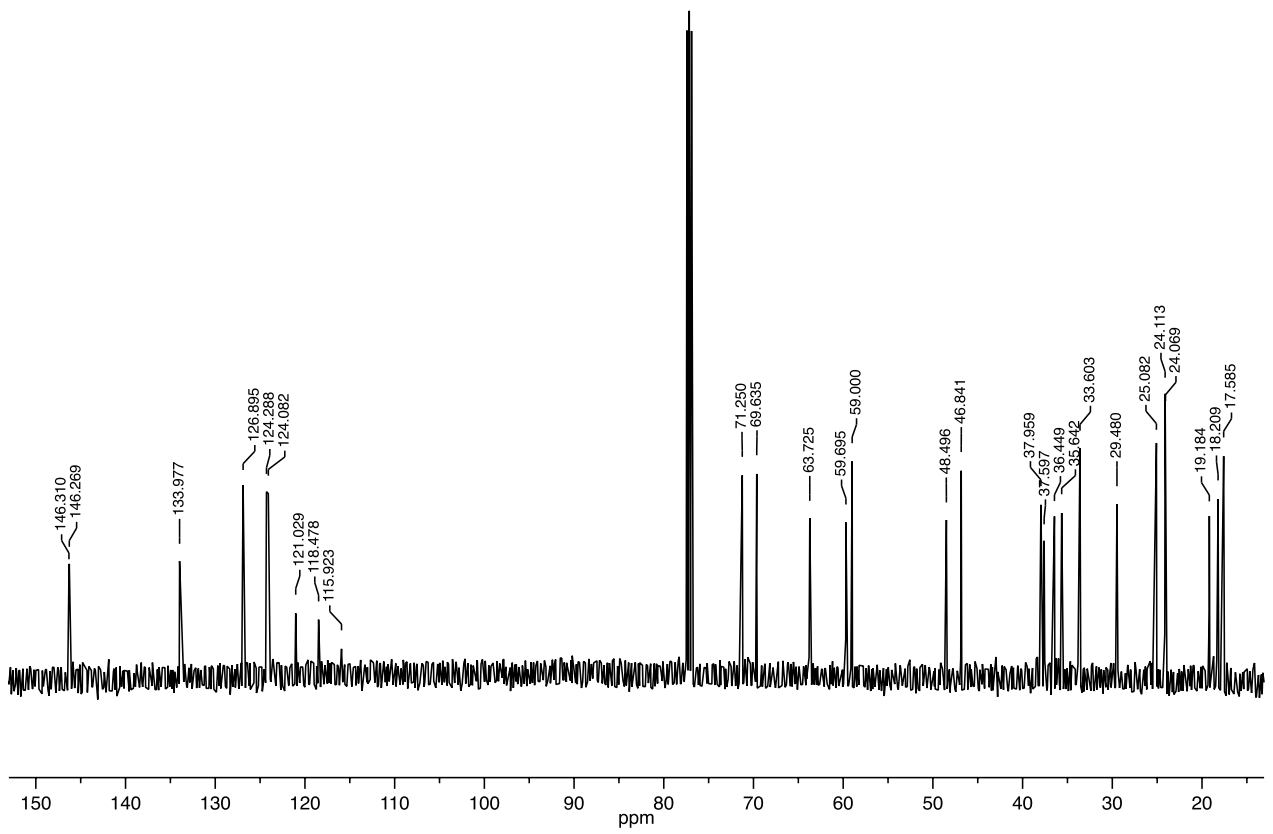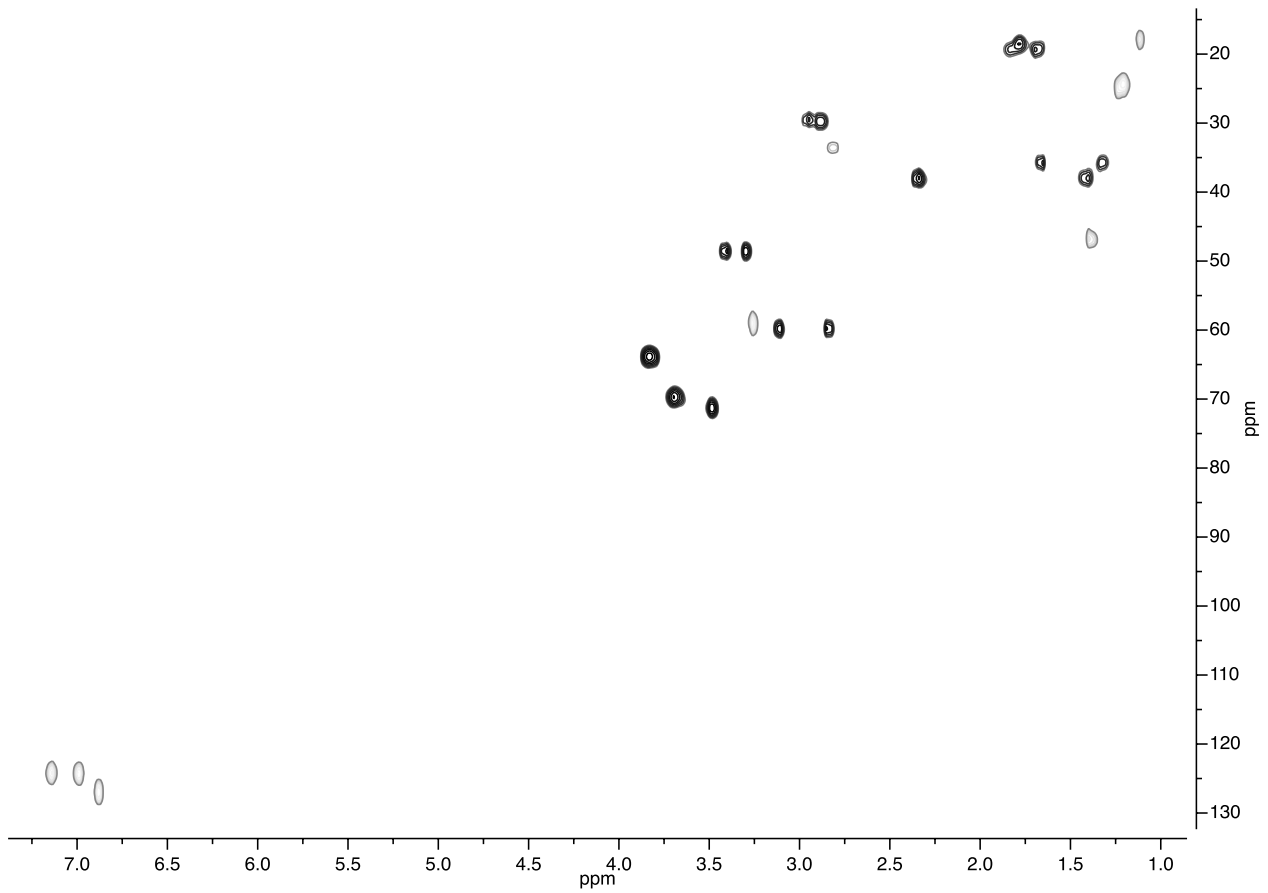

# **<sup>1</sup>H, <sup>13</sup>C and HSQC spectra of compound 6a**

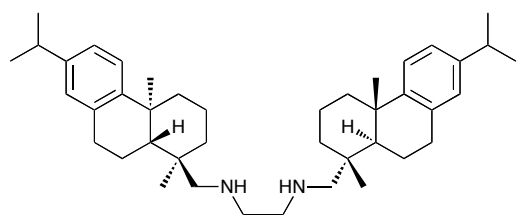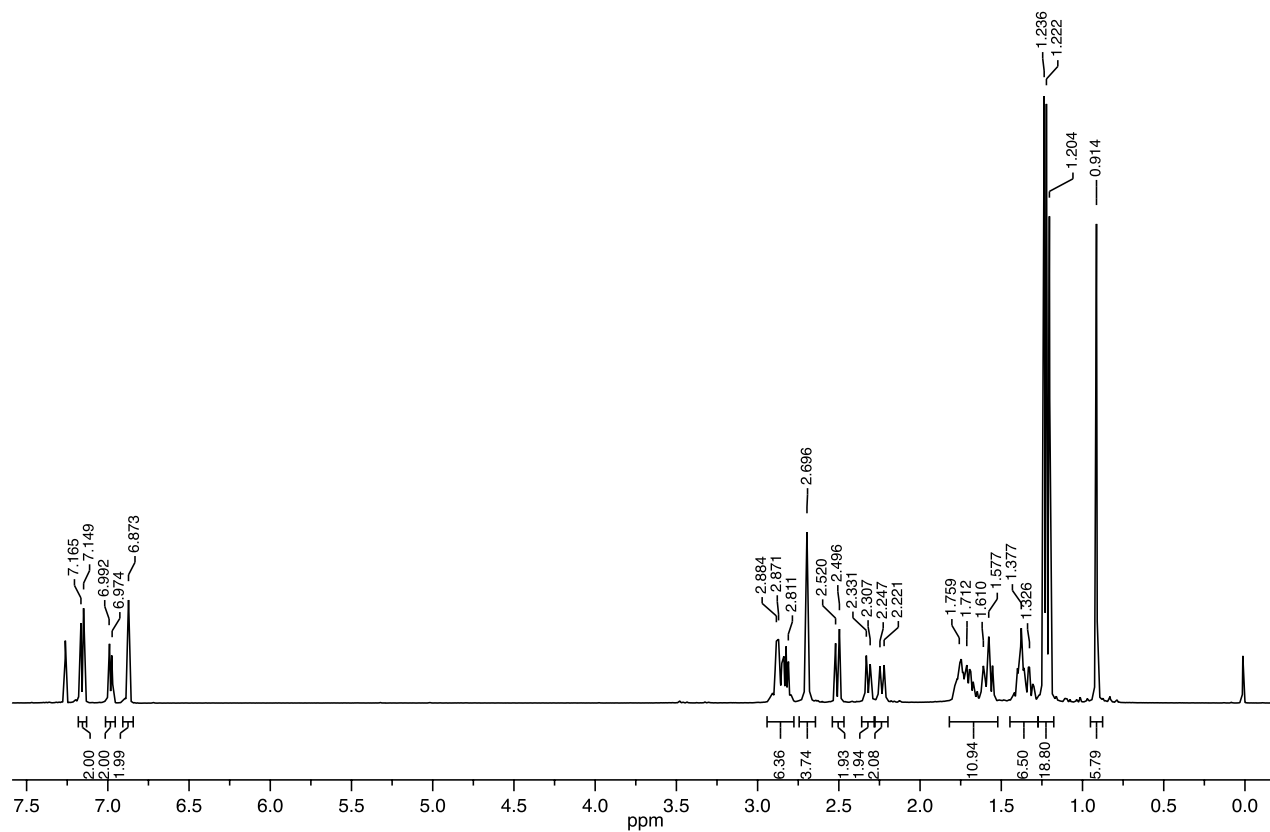

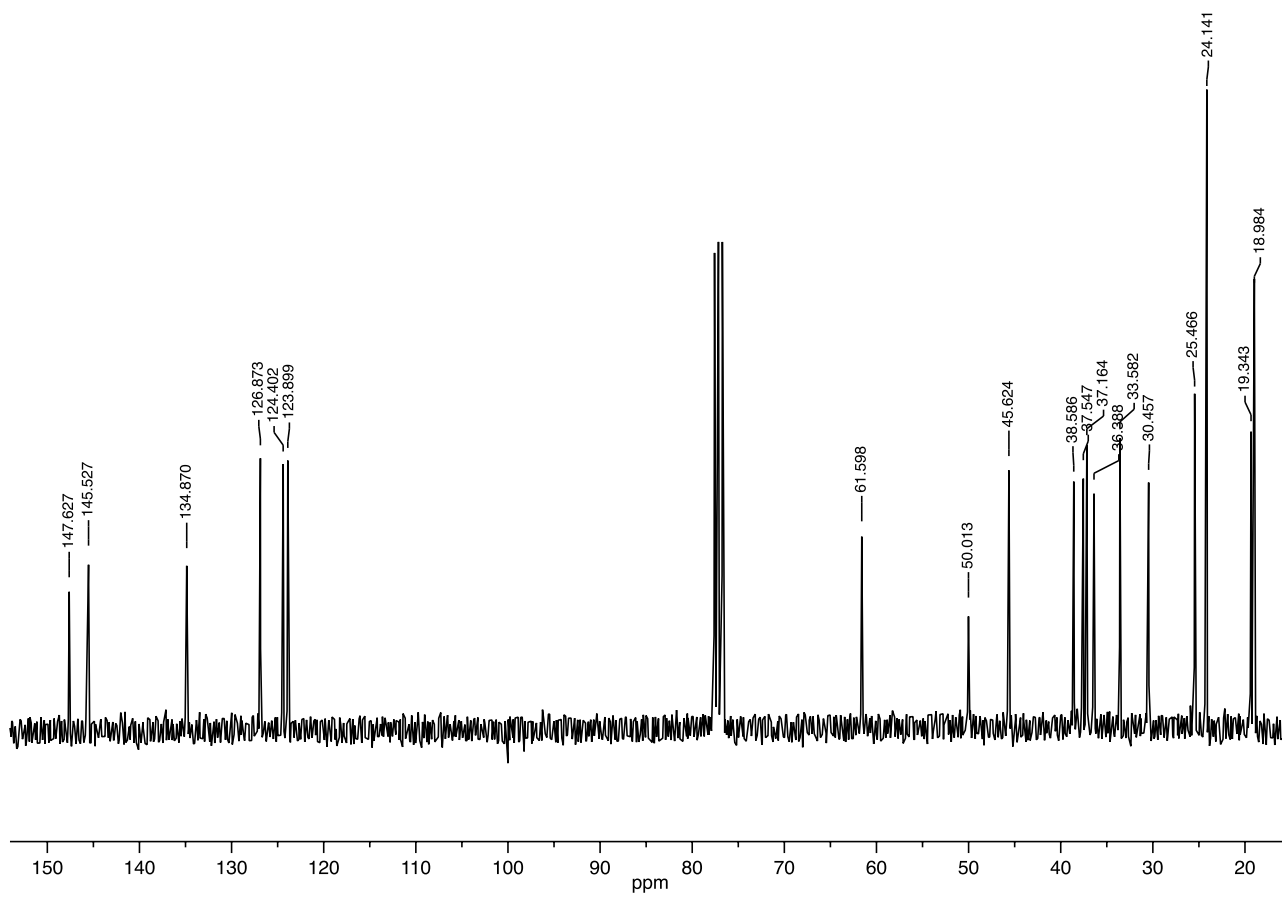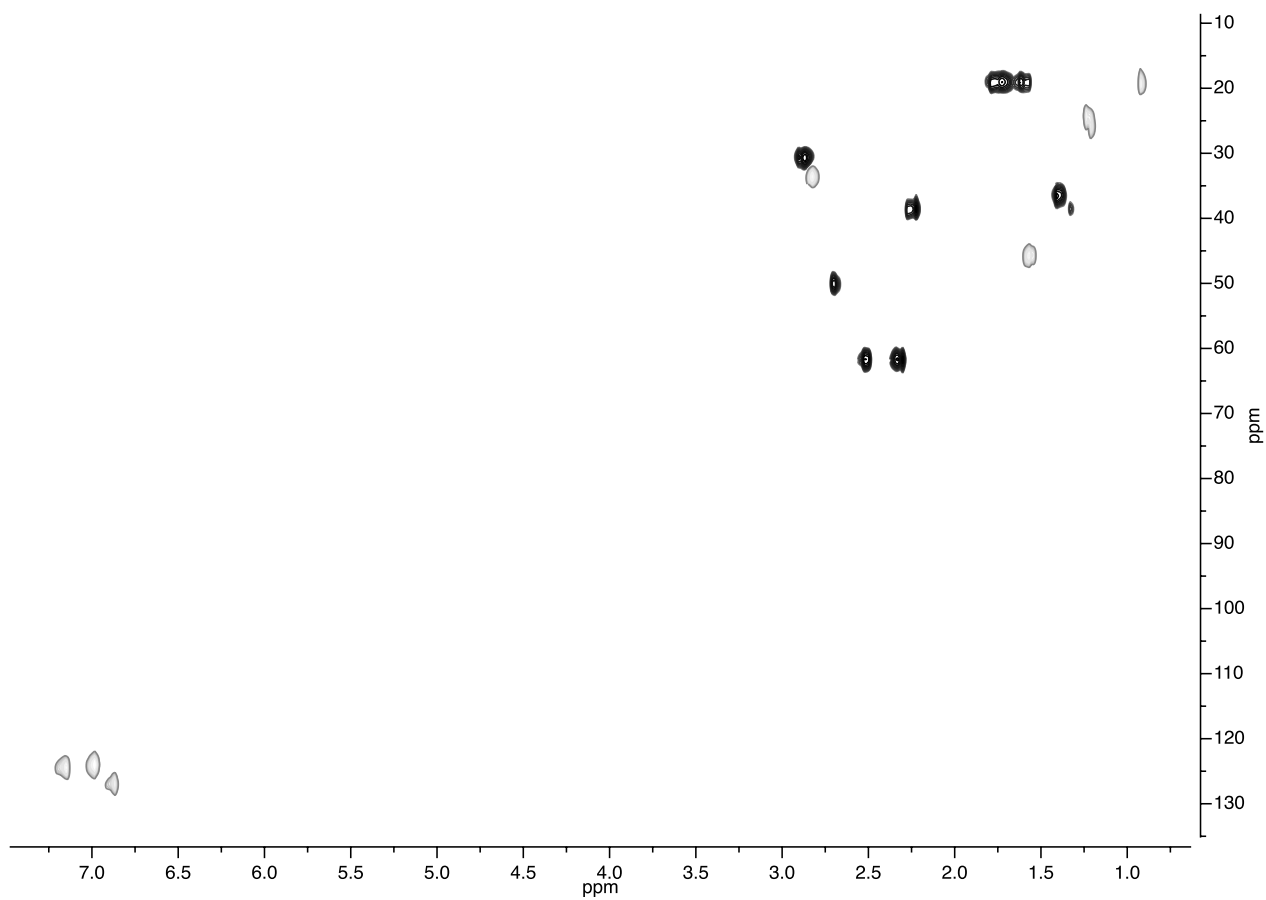



# 1H, 13C and HSQC spectra of compound 6b

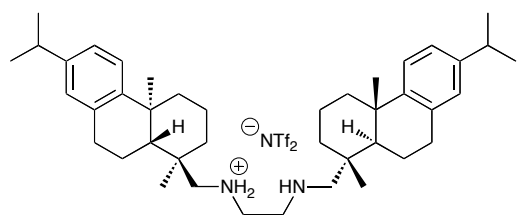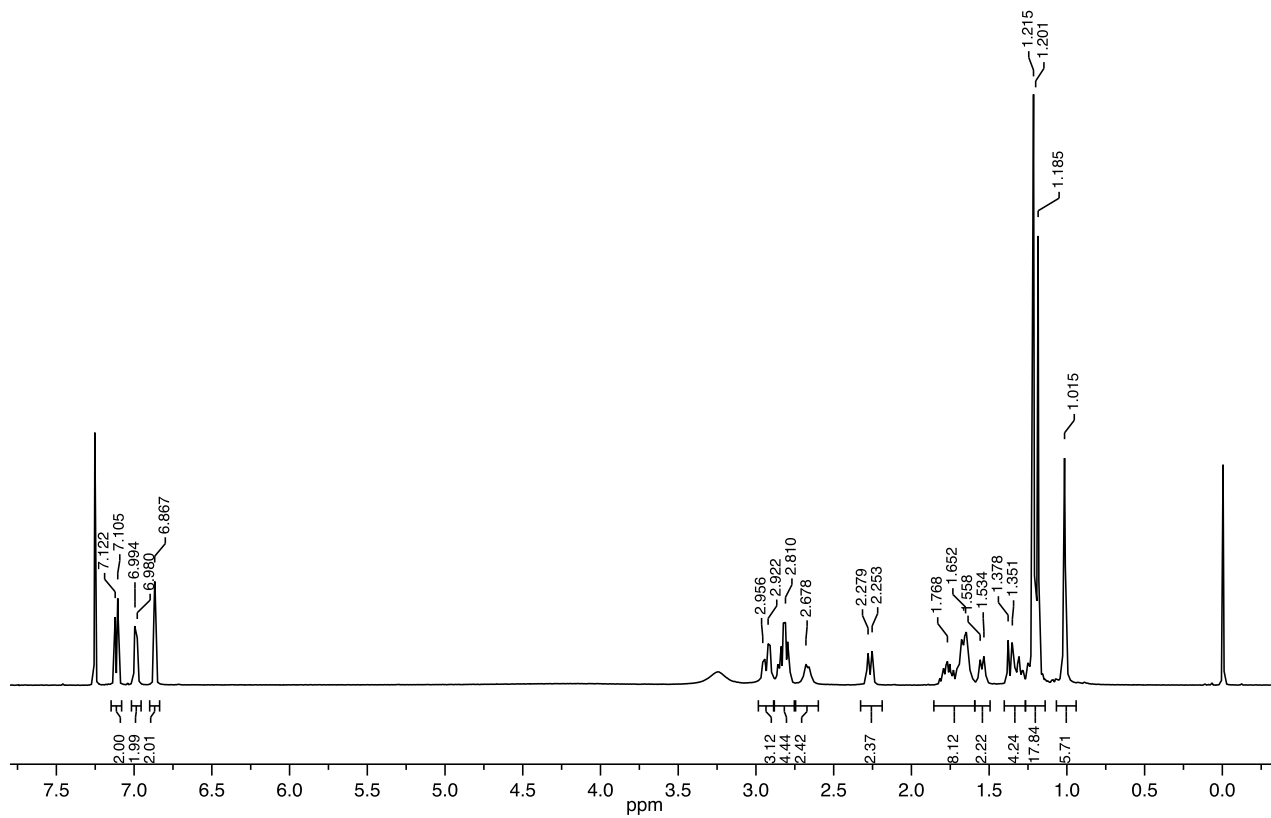

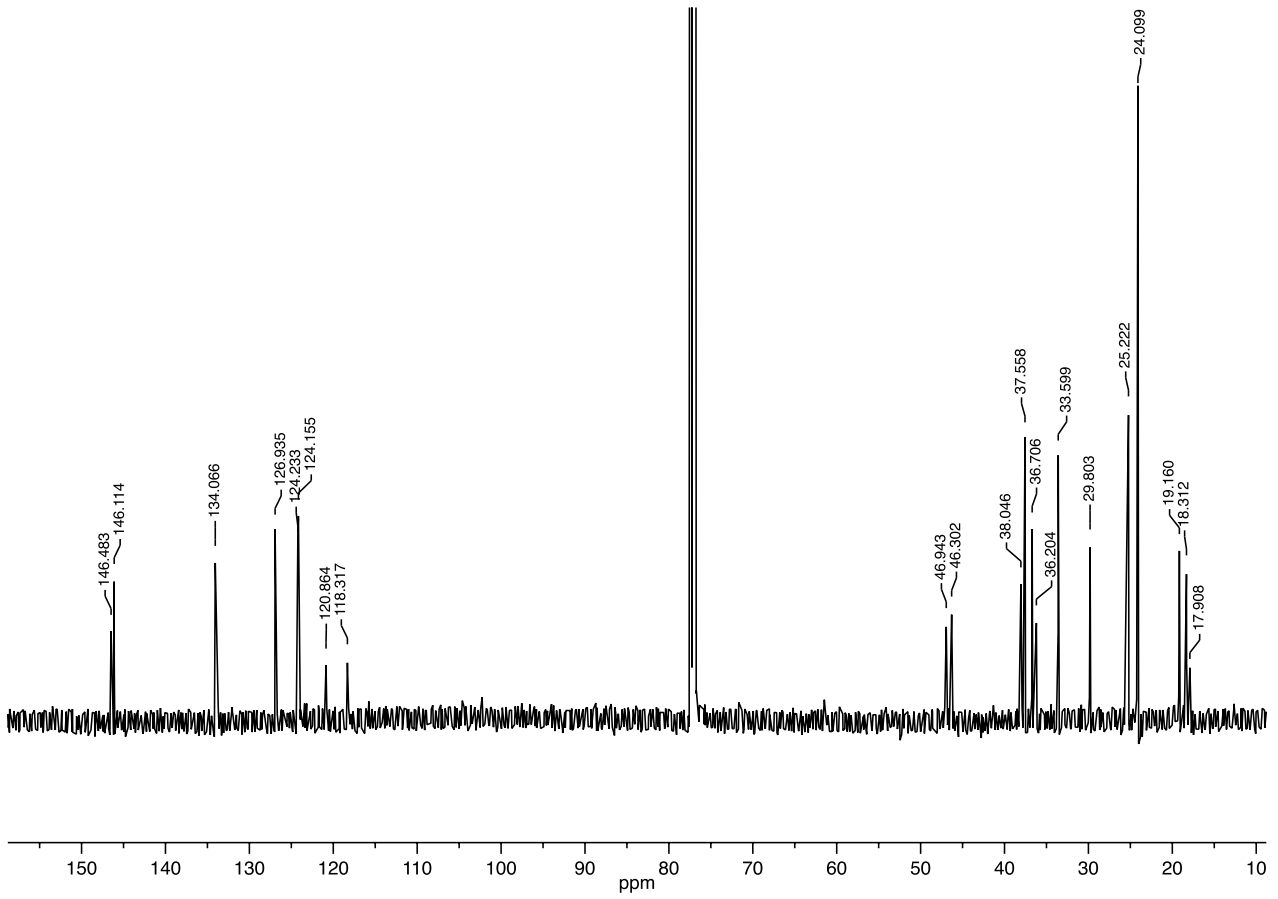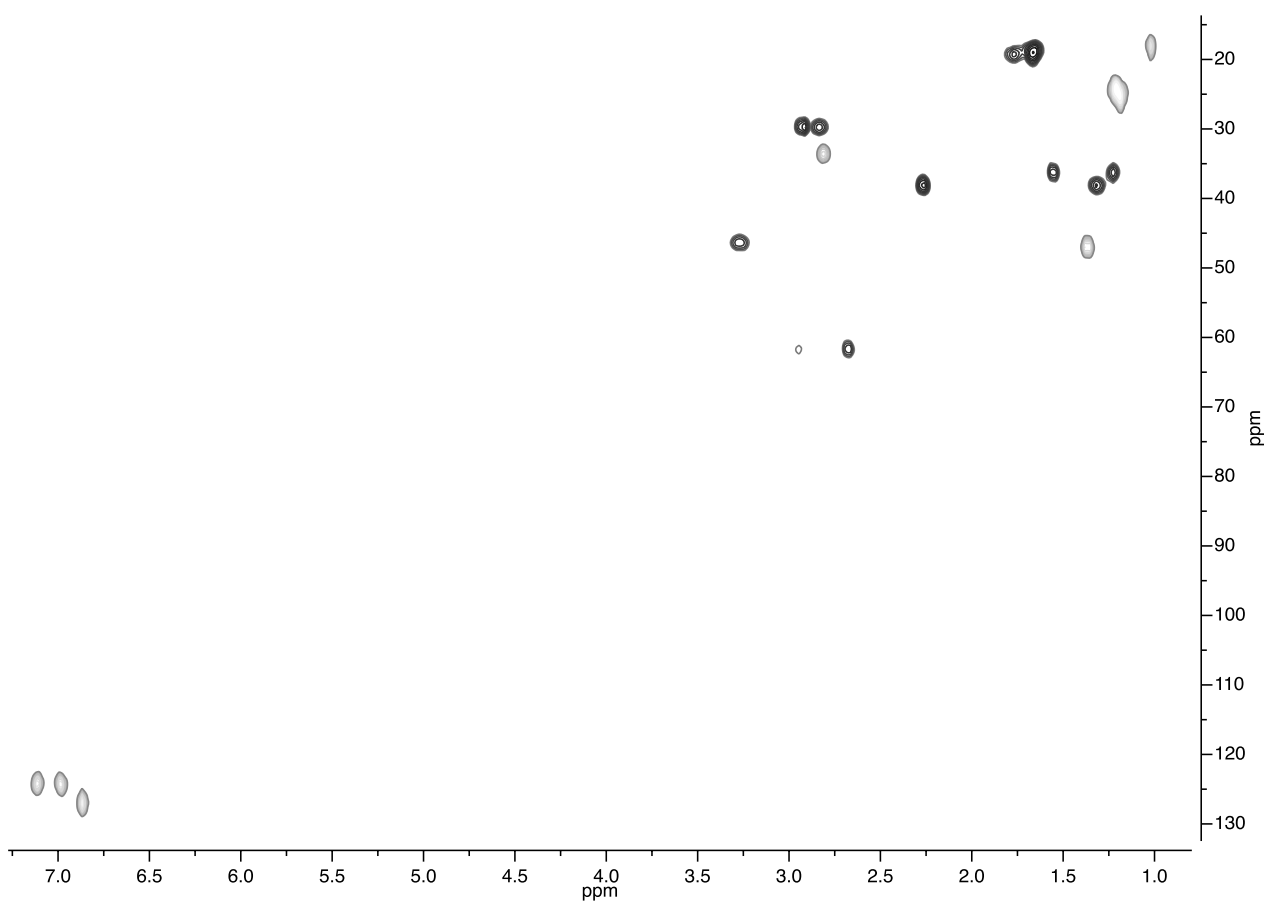

Supplement: c5ob01667c1.pdf [file c5ob01667c1.pdf]
